# Insulin mRNA is stored in RNA granules in resting beta cells

Jovana Vasiljević<sup>1,2,3</sup>, Djordje Vasiljević<sup>4</sup>, Katharina Ganß<sup>1,2,3</sup>, Anke Sönmez<sup>1,2,3</sup>, Carolin Wegbrod<sup>1,2,3</sup>, Esteban Quezada<sup>1,2,3</sup>, Carla Münster<sup>1,2,3</sup>, Eyke Schöniger<sup>1,2,3</sup>, Daniela Friedland<sup>1,2,3</sup>, Nicole Kipke<sup>1,2,3</sup>, Marius Distler<sup>2,3,5</sup>, Matthias Selbach<sup>4,6</sup>, and Michele Solimena<sup>1,2,3, #</sup>

**1** Molecular Diabetology, University Hospital and Faculty of Medicine Carl Gustav Carus, TU Dresden, Dresden, Germany

**2** German Center for Diabetes Research (DZD e.V.), 85674 Neuherberg, Germany

**3** Paul Langerhans Institute Dresden (PLID) of the Helmholtz Center Munich at the University Hospital Carl Gustav Carus and Faculty of Medicine of the TU Dresden, Dresden, Germany

**4** Max Delbrück Center for Molecular Medicine (MDC), Berlin, Germany

**5** Department of Visceral, Thoracic and Vascular Surgery, University Hospital and Faculty of Medicine Carl Gustav Carus, TU Dresden, Dresden, Germany

**6** Charité – Universitätsmedizin Berlin, Berlin, Germany

**#** Corresponding author.

Tel.: +49-351-796-366-11

e-mail: Michele.Solimena@uniklinikum-dresden.de

## Abstract

The glucose-stimulated biosynthesis of insulin in pancreatic islet beta cells is post-transcriptionally regulated. Several RNA-binding proteins (RBPs) that regulate *Insulin* mRNA stability and translation also bind mRNAs coding for other insulin secretory granule (ISG) proteins. However, an overview of these interactions and their glucose-induced remodelling is still missing. Here we identify two distinct sets of RBPs which were preferentially pulled down with the 5'-UTRs of mouse *Ins1*, *Ins2*, spliced *Ins2*, *Ica512/Ptprn* and *Pc2/Pcsk2* mRNAs from extracts of either resting or stimulated mouse insulinoma MIN6 cells compared to those recovered with the 5'-UTR of mouse *Tubg1* encoding for  $\gamma$ -tubulin. Among RBPs binding in resting conditions to all tested transcripts for ISG components was hnRNP A2/B1. *Hnmpa2b1* KO MIN6 cells contained lower levels of *Ins1* mRNA, proinsulin and insulin compared to control cells. In resting cells, both hnRNP A2/B1 and *Insulin* mRNAs localized to stress granules, which dissolved upon glucose stimulation. *Insulin* mRNA-positive RNA granules were also found in human pancreatic beta cells *in situ*. Our results suggest that resting beta cells store mRNAs for insulin secretory granule proteins in stress granules through specific RNA protein interactions. Glucose stimulation remodels these interactions, releasing the transcripts, and another set of RBPs coordinates their translation.

## Keywords:

Beta cell; post-transcriptional regulation; RNA-binding proteins; stress granule; glucose-stimulated insulin biosynthesis

## Introduction

Insulin is the main hormone for control of blood glucose homeostasis. It is produced in pancreatic beta cells and packaged into secretory granules that undergo glucose-stimulated secretion. After a meal, the increase in blood glucose concentration prompts beta cells to secrete insulin into the bloodstream. Insulin stimulates glucose uptake into muscle and fat cells, while it inhibits gluconeogenesis and glucose release of hepatocytes, hence lowering blood glucose concentration to fasting levels. The beta cells, therefore, have one main function: to produce and secrete enough insulin in order to regulate blood glucose surges.

Surprisingly, beta cells secrete <5% of their insulin stores upon glucose stimulation (Henquin, 2021). On the other hand, newly-synthesized insulin is preferentially secreted (Ivanova *et al.*, 2013). Glucose stimulates *de novo* insulin biosynthesis and secretory granule biogenesis at a lower threshold than that for glucose-stimulated insulin secretion (Boland *et al.*, 2017), which maintains optimal stores of “new” secretory granules (Skelly *et al.*, 1998), and thus the responsiveness of beta cells to changes in blood glucose concentration. Impaired glucose responsiveness of beta cells, such as reduced ability to upregulate secretory granule production in response to insulin resistance and hyperglycemia may lead to reduced insulin secretion and type 2 diabetes (T2D). On the other hand, a moderately leaky biosynthesis and release of insulin in fasting conditions may also drive insulin resistance, and thus the vicious circle leading to T2D (Mehran *et al.*, 2012).

*Insulin* mRNA accounts for up to 30% of beta cell transcriptome (Tillmar *et al.*, 2002), and each beta cell produces on average  $>3 \times 10^3$  preproinsulin peptides every second (Schuit *et al.*, 1991). This outstanding translation rate comes with several challenges. First, preproinsulin translation needs to increase quickly upon glucose stimulation in order for the younger secretory granules to be rapidly replenished. Accordingly, insulin biosynthesis is specifically regulated: while stimulated beta cells increase total protein biosynthesis ~2-fold, they enhance that of preproinsulin up to 20-fold (Guest *et al.*, 1989; Wicksteed *et al.*, 2001). Also, the newly-synthesized insulin must be packaged into newly-assembled secretory granules, which contain numerous other proteins required for proinsulin conversion and its exocytosis (Davidson and Hutton, 1987; Molinete *et al.*, 2000; Lemaire *et al.*, 2012). Among these are proprotein convertases PC1/3 and PC2, islet cell autoantigen ICA512/IA-2/PTPRN, members of the granin family and SNARE proteins. In order for beta cells to operate properly, they must quickly and specifically coordinate the translation of many secretory granule proteins.

Glucose-stimulated beta cells increase insulin biosynthesis, even while the mRNA levels remain unchanged for up to at least 2 hours after stimulation (Itoh and Okamoto, 1980; Welsh *et al.*, 1985; Wicksteed *et al.*, 2001), implying the involvement of post-transcriptional mechanisms. Other proteins of insulin secretory granules are similarly post-transcriptionally regulated, such as PC1/3, PC2, ICA512 and granins (Guest *et al.*, 1989; Guest *et al.*, 1991; Knoch *et al.*, 2004).

Post-transcriptional regulation relies on the binding of RNA-binding proteins (RBPs) to regulatory sequences in mRNAs, together forming ribonucleoprotein (RNP) complexes (Gerstberger *et al.*, 2014; Singh *et al.*, 2015). It is the unique RNP code that confers gene-specific post-transcriptional regulation and defines whether a mRNA will be transported, translated, repressed and stored, or degraded (Kilchert *et al.*, 2020). These processes take place in membraneless organelles called RNA granules. Each different type of RNA granules serves a specific function: repressed mRNAs are stored in stress granules upon cellular stress, whereas mRNA degradation takes place in P bodies (Youn *et al.*, 2019; Advani and Ivanov, 2020; Tauber *et al.*, 2020). Remodelling of RNP complexes alters the fate and localization of mRNAs and thereby modifies the gene expression profile (Singh *et al.*, 2015; Kilchert *et al.*, 2020).

Such post-transcriptional regulation has many advantages. Cells can quickly activate protein biosynthesis without depending on *de novo* transcription. Also, different mRNAs can be diversely regulated by different RBPs, whilst functionally related mRNAs can be co-regulated through sequences recognized by the same set of RBPs. Pancreatic islet beta cells exploit these mechanisms to fine-tune their control of glucose homeostasis.

It has been proposed that glucose activates the presynthesized, inactive *Insulin* mRNA (Hammonds *et al.*, 1987), presumably by remodelling the RBPs bound to its regulatory sequences. Within the 5'-UTR of *Insulin* mRNA, a 29 nucleotide (nt) stem loop (Muralidharan *et al.*, 2007) and the preproinsulin glucose element (ppIGE) (Wicksteed *et al.*, 2007) are required for its glucose-induced increase in translation. Enhanced stability of *Insulin* mRNAs is conveyed by a polypyrimidine motif (Tillmar *et al.*, 2002; Knoch *et al.*, 2004) and a *UUGAA* motif at its 3'-UTR (Wicksteed *et al.*, 2001). These sequences are conserved in rat, mouse and human *Insulin* transcripts (Knight and Docherty, 1992; Tillmar *et al.*, 2002; Magro and Solimena, 2013), and some of them are conserved in the UTRs of mouse *Pc1/Pcsk1*, *Pc2*, *Ica512*, *pro-islet amyloid polypeptide (proIAPP)* and *chromogranin A (ChgA)* (Uchizono *et al.*, 2007) mRNAs.

Some *Insulin* mRNA RBPs have been previously identified. The best characterized is polypyrimidine-tract binding protein 1 (PTBP1), which coordinates the expression of multiple secretory granule cargoes (Magro and Solimena, 2013). Glucose-stimulated binding of PTBP1 to a polypyrimidine sequence in the 3'-UTR of rat *Insulin1* mRNA increases the stability of the latter (Tillmar *et al.*, 2002). Our previous results indicate that Ptbp1 similarly binds and stabilizes the 3'-UTRs of the rat *Insulin2*, *Pc2* and *Ica512* mRNAs upon glucose stimulation (Knoch *et al.*, 2004, 2006). Additionally, Ptbp1 binding to the 5'-UTRs of these mRNAs stimulates their cap-independent translation, thereby selectively increasing the expression of secretory granule proteins (Knoch *et al.*, 2014).

RBPs are among the most rapidly regulated classes of proteins in glucose and IBMX treated INS-1 cells (Süss *et al.*, 2009), suggesting their critical role for rapid responses of beta cells to glucose. Furthermore, nuclear retention of PTBP1 (Ehehalt *et al.*, 2010) and its suppression following exposure of human islets to prolonged hyperglycemia (Fred *et al.*, 2010) reduces glucose stimulated insulin biosynthesis and secretion, respectively. Common polymorphisms in *PTBP1* are linked to impaired glucose stimulated insulin secretion in humans (Henri *et al.*, 2012).

While it is accepted that glucose remodels RBPs bound to mRNAs for insulin and other secretory granule proteins, we lack a global understanding of the RNP code in different conditions. Additional RBPs that post-transcriptionally regulate insulin expression include HuD (Lee *et al.*, 2012; Kim *et al.*, 2016), TIAR (Fred *et al.*, 2016), DDX1 (Li *et al.*, 2018), however, their involvement in co-regulating the expression of several insulin secretory granule proteins is unknown. Furthermore, the storage of the presynthesized *Insulin* mRNA in the cytoplasm was vaguely proposed (Hammonds *et al.*, 1987), but the details are not known.

Here, we used *in vitro* RNA pull-downs coupled with mass spectrometry (MS) to identify factors binding to the 5'-UTRs of mRNAs for several insulin secretory granule proteins. We show that these mRNAs share several common interacting RBPs, which differ in resting and glucose stimulated conditions. We confirmed that one of these proteins, hnRNP A2/B1, regulates insulin production. We also demonstrate that the *Insulin* mRNA is located in stress granules in resting cells, which dissolve upon glucose stimulation. We propose that in resting beta cells, stress granules store and repress *Insulin* mRNA bound to a set of RBPs that co-regulate mRNAs for other secretory granule proteins. Glucose entry into beta cells fosters the remodelling of RNP complexes, thereby causing the dissolution of stress granules and enabling a co-regulated burst in mRNA translation and insulin secretory granule biogenesis.

## Results

### The 5'UTRs of secretory granule proteins share common protein binders in resting and glucose-stimulated conditions

Several proteomic approaches enable identification of proteins interacting with individual mRNA sequences (Gräwe *et al.*, 2020). In order to determine if glucose remodels RNPs regulating the translation of insulin secretory granule proteins, we performed *in vitro* RNA pull-downs using cytoplasmic extracts of resting and stimulated mouse insulinoma MIN6 cells, and identified the bound proteins using mass spectrometry (MS) (**fig. 1a**). We chose the 5'-UTRs of mouse *Ins1*, *Ins2*, *Pc2* and *Ica512* mRNAs as target transcripts, since these are known to be post-transcriptionally coordinated by PTBP1 (Knoch *et al.*, 2014) and hnRNP K (our unpublished data). In mouse beta cells the majority of insulin results from the translation of *Ins2* mRNA (Wentworth *et al.*, 1992). At variance with mouse islets, in our MIN6 cells *Ins2* mRNA is twice as abundant as *Ins1* mRNA. Because this shorter transcript variant is spliced within its 5'-UTR, we also included it in our assays.

To identify RBPs that specifically bind to the target 5'-UTRs, we required a control to account for unspecific binding. Since the expression of our chosen insulin secretory granule proteins is glucose regulated, we assumed that their transcripts bind RBPs that do not equally bind to transcripts for housekeeping proteins or to common RNA features, such as the 5' cap. The mouse  $\gamma$ -tubulin mRNA 5'-UTR did not bind PTBP1 and hnRNP K, our positive RBP controls (**suppl. fig. 1a**). Therefore, the 5'-UTR of the mouse  $\gamma$ -tubulin mRNA was used as a control in subsequent tests. The identified proteins and log<sub>2</sub> transformed LFQ values are shown in **suppl. table 1**.

**Fig. 1b** shows a clear segregation of our samples according to glucose stimulation with replicate samples clustering together, indicating high reproducibility. Moreover, based on their interacting proteins, RNP complexes for secretory granule proteins cluster separately from those for  $\gamma$ -tubulin in both resting and stimulated conditions. Replica experiments displayed a similar PCA profile (**suppl. fig. 1b**). This was true for all tested 5'-UTRs except for that of *ICA512* mRNA. These results corroborate the hypothesis that a specific RNP code enables the selective glucose-dependent regulation of mRNAs for insulin secretory granule proteins.

Since the RNPs of transcripts coding for secretory granule proteins formed separate clusters in resting and glucose-stimulated conditions, we assumed that the same RBPs bind to these transcripts. With permutation-based t-tests, we compared the enrichment of the proteins interacting with each target mRNA 5'-UTR to that of  $\gamma$ -tubulin in the same condition (**fig. 1c**–

**d** and **suppl. fig. 1c-d**). Significance was determined as described in (Tyanova *et al.*, 2016), with FDR = 0.05 and slope  $s_0 = 0.1$  (**suppl. table 2**). In resting conditions, we recovered seven RBPs selectively enriched with all target 5'-UTRs (labelled in orange, fig. 1c and 1e, and suppl. fig. 1c). Similarly, in stimulated conditions, there were twelve common significantly enriched RBPs (labelled in blue, **fig. 1d** and **1f**, and **suppl. fig. 1d**). PTBP1 was specific for all of the target RNPs in both resting and glucose-stimulated conditions, whereas hnRNP K was a shared RBP enriched upon stimulation. DDX1, which was shown to interact with the *Insulin* mRNA in rat insulinoma INS-1 cells (Li *et al.*, 2018), was enriched by the 5'-UTR of mRNA for secretory granule proteins upon stimulation. Hence, we identified a common set of RBPs associated with secretory granule protein transcripts in resting conditions. The corresponding RBPs are remodelled upon glucose stimulation, conceivably to enable the coordinated post-transcriptional expression of these mRNAs. To our knowledge, apart from PTBP1, DDX1 and hnRNP K, the other common RBPs, such as G3BP1 and several members of the hnRNP family, have not previously been associated with secretory granule protein mRNAs.

### **hnRNP A2/B1 binds to the 5'-UTRs of mRNAs for secretory granule proteins**

hnRNP A2/B1 is one of the identified RBPs that displayed significantly enriched binding to secretory granule protein transcripts in resting conditions (**fig. 1c** and **1e**, and **suppl. fig. 1c**). As a member of the hnRNP family, hnRNP A2/B1 functions in virtually all aspects of post-transcriptional regulation (Liu and Shi, 2021; Low *et al.*, 2021). Previously, hnRNP A2/B1 has been shown to reside in RNA granules containing repressed RNAs, such as transport granules and stress granules neurons and oligodendrocytes (Ainger *et al.*, 1997; Gao *et al.*, 2008; Kim *et al.*, 2013; Martinez *et al.*, 2016). Since we hypothesized that resting beta cells store secretory granule protein transcripts in the cytoplasm, we further investigated the role of hnRNP A2/B1 in regulating the production of insulin and other secretory granule proteins.

We first validated the binding of hnRNP A2/B1 to mRNAs for secretory granule proteins by RNA-IP. The recovery of *Ins1*, *Ins2* and *Pc2* mRNAs upon hnRNP A2/B1 immunoprecipitation (IP) was enriched compared with the recovery of  $\gamma$ -tubulin mRNA (**fig. 2a**), while *Ica512* mRNA recovery was similar to that of  $\gamma$ -tubulin mRNA (**fig. 2a**), possibly reflecting their positions on the PCA plot (**fig. 1b**).

The binding sequence of hnRNP A2/B1 consists of a 21 nucleotide (nt) long A2 response element (A2RE21), with a shorter A2RE11 defined as the core binding motif (Ainger *et al.*, 1997; Munro *et al.*, 1999). We identified sequences homologous to the A2REs within the 5'-UTRs of several secretory granule protein transcripts (**fig. 2b**). These sequences are conserved in mouse, rat and human insulin transcripts. In most of these transcripts, the



A2RE11 was positioned first, followed by the longer A2RE21. We tested if hnRNP A2/B1 binds to these sequences by RNA pull-down with the *Ins1* mRNA 5'-UTR harboring mutated A2REs (**fig. 2c**). The mutation of the A2RE11 both individually and in combination with the A2RE21 abolished hnRNP A2/B1 binding to the *Ins1* mRNA 5'-UTR, while its binding upon A2RE21 mutation was reduced. These data indicate that hnRNP A2/B1 binds to *Ins1* mRNAs through the A2REs in its 5'-UTR. Presumably, the putative A2REs in the other secretory granule protein transcripts also specifically bind hnRNP A2/B1

### hnRNP A2/B1 regulates the expression of secretory granule proteins

Since we determined that hnRNP A2/B1 binds to the 5'-UTRs of secretory granule protein mRNAs through A2REs, we investigated whether it affects their expression. We generated an *Hnrnpa2b1* KO MIN6 cell clone using CRISPR/Cas9 editing with a guide positioning the cleavage near the start codon (**suppl. fig. 2a**, boxed region). The editing abolished *Hnrnpa2b1* expression due to a large insertion that removed its start codon (**suppl. fig. 2b and c**). While *Ins1* mRNA levels were reduced in both resting and glucose-stimulated *Hnrnpa2b1* KO cells, *Ins2* mRNA levels were unchanged (**fig. 3a**). Glucose-stimulated *Hnrnpa2b1* KO cells contained less insulin compared to WT cells (**fig. 3b**), while proinsulin, as measured by ELISA, was reduced in both resting and stimulated *Hnrnpa2b1* KO cells (**fig. 3c**), indicating that hnRNP A2/B1 regulates insulin biosynthesis regardless of glucose concentrations. Moreover, ELISA confirmed the lower insulin content of *Hnrnpa2b1* KO cells, which secreted less insulin upon stimulation (**fig. 3c**). However, the stimulation index of WT and *Hnrnpa2b1* KO cells did not differ, indicating that the secretory capacity of the latter was not altered and that their reduced insulin release reflects their lower insulin production.

Even though hnRNP A2/B1 binds to the 5'-UTRs of *Pc2* and *Ica512* mRNAs, the levels of these transcripts in *Hnrnpa2b1* KO and WT cells were similar (**suppl. fig. 3a and 3b**). Moreover, glucose stimulation similarly upregulated the levels of PC1/3, PC2 and ICA512 proforms in WT and *Hnrnpa2b1* KO cells (**suppl. fig. 3b**). Possibly, PC1/3, PC2, and ICA512 expression in the *Hnrnpa2b1* KO cells can be rescued by a paralogue protein with redundant functions. One possible candidate is hnRNP A1, which is also found in the secretory granule protein RNP complexes in resting conditions (**fig. 1c and 1e**, and **suppl. fig. 1c**) and is upregulated in *Hnrnpa2b1* cells (**suppl. fig. 3b**).

### hnRNP A2/B1 regulates the translation of secretory granule proteins in beta cells

We have shown that hnRNP A2/B1 regulates insulin production, but the mechanism of action is unclear. To further explore its role in insulin translation, we generated several translation reporters, and tested if the mutation of A2REs in the *Ins1* mRNA 5'-UTR affected the



biosynthesis of a downstream luciferase reporter (**fig. 4b**). Compared with the WT sequence, we measured reduced luciferase activity in reporter constructs harboring mutated A2REs. The mutation of A2RE21 in the *Ins1* mRNA 5'-UTR resulted in the lowest luciferase signal, which was similar to the signal detected with the  $\gamma$ -tubulin mRNA 5'-UTR coupled luciferase construct. The upregulation in glucose-stimulated insulin biosynthesis is 10 times more than the upregulation of the total beta cell proteome (Guest *et al.*, 1989). Our data demonstrate that the binding of hnRNP A2/B1 contributes to this specific regulation. We suggest that hnRNP A2/B1 is an RBP that specifically regulates the expression of *insulin* mRNA relative to other housekeeping genes.

### **hnRNP A2/B1 and *Insulin1/2* mRNAs reside in stress granules in the cytoplasm of resting MIN6 cells**

hnRNP A2/B1 is a component of RNA granules that contain repressed mRNAs (Ainger *et al.*, 1997; Gao *et al.*, 2008; Kim *et al.*, 2013; Martinez *et al.*, 2016). For this reason, we investigated its localization in resting and glucose stimulated MIN6 cells. In resting cells hnRNP A2/B1 was localized to cytoplasmic structures which resemble RNA granules, which were absent in glucose stimulated cells (**suppl. fig. 4a**). RNase treatment of the cells prior to fixation abolished the presence of these structures, confirming their identity as RNA granules (**suppl. fig. 4b**).

We further verified the identity of hnRNP A2/B1<sup>+</sup> structures with different RNA granule markers. In resting cells, hnRNP A2/B1 co-localized with stress granule markers eIF3b and G3BP1 (**suppl. fig. 4c** and **4d**), but not with the P-body marker Dcp1a (**suppl. fig. 4e**). The colocalization of G3BP1 and eIF3b was used as a positive control (**suppl. fig. 4f**), and colocalization was quantified using the Pearson's correlation coefficient (**suppl. fig. 4g**). Both stress granule markers were highly colocalized with hnRNP A2/B1 in resting, but not in glucose stimulated cells. As stress granules are compartments where repressed mRNAs are stored during cell stress, we hypothesized that resting beta cells use hnRNP A2/B1<sup>+</sup> RNA granules to store *Ins1/2* mRNA and protect it from degradation.

Since hnRNP A2/B1 binds to the 5'-UTRs of mRNAs coding for secretory granule proteins (**fig. 1c, 1e, 2a** and **suppl. fig. 1c**), we presumed that these transcripts colocalize with hnRNP A2/B1<sup>+</sup> stress granules. In resting MIN6 cells, *Ins1/2* mRNA colocalized indeed with hnRNP A2/B1<sup>+</sup> granules (**suppl. fig. 5a**). This colocalization was lost upon glucose stimulation, where the *Ins1/2* mRNA was dispersed throughout the cytoplasm (**suppl. fig. 5a**), presumably being translated at the ER. To verify the specificity of the probes, we confirmed that mouse glucagonoma  $\alpha$ -TC cells were negative for *Ins1/2* mRNA and positive for the control *Gapdh*

mRNA (**suppl. fig. 5b**). Additionally, we verified that *Gapdh* mRNA does not localize to stress granules in resting MIN6 cells (**suppl. fig. 5c**). Taken together, these data suggest that resting MIN6 cells store *Ins1/2* mRNAs in stress granules. Glucose stimulation remodels RBPs bound to these mRNAs and dissolves stress granules, releasing the mRNAs for translation.

A caveat of the MIN6 cells used in all previous experiments is their threshold of 1-2 mM glucose for stimulated insulin biosynthesis and secretion, which is much lower than the 5-5.5 mM glucose threshold of primary mouse beta cells. Accordingly, 2.8 mM glucose already activates the biosynthesis of secretory granule proforms in these MIN6 cells (**suppl. fig. 5d**), which therefore only rest in media with 0 mM glucose. However, as glucose absence is equivalent to starvation, the stress granules detected in resting MIN6 cells may reflect a stress response rather than a physiological mechanism regulating insulin translation. For these reasons, we assessed the glucose response of MIN6-K8 cells (Iwasaki *et al.*, 2010), a clone of the MIN6 cells that do not respond to physiologically low glucose concentrations. Indeed, MIN6-K8 cells incubated with 2.8 mM glucose did not enhance the biosynthesis of secretory granule proteins compared to glucose starvation, while their proforms were clearly increased upon stimulation with 25 mM glucose (**suppl. fig. 5d**).

The stress response of the MIN6 and MIN6-K8 cells was assessed by comparing eIF2 $\alpha$  and AMPK $\alpha$  phosphorylation at different glucose concentrations. The phosphorylation of eIF2 $\alpha$  upon stress induces translational arrest, and the stalled 48S preinitiation complexes are conveyed to stress granules (Kedersha *et al.*, 2002). AMPK $\alpha$  phosphorylation is a measure of the energy and nutrient status of a cell: low glucose and energy status induces the phosphorylation of the  $\alpha$ -subunit of AMPK, leading to a translational arrest through the mTOR pathway (Szkudelski and Szkudelska, 2019). eIF2 $\alpha$  was phosphorylated in both MIN6 cells and the MIN6 K8 cells at 0 mM glucose (**suppl. fig. 5e**), and stress granules were present (**suppl. fig. 4c** and **4d**). In the presence of 2.8 mM glucose, eIF2 $\alpha$  phosphorylation was significantly reduced in both cell lines (**suppl. fig. 5e**). MIN6 cells also had reduced AMPK $\alpha$  phosphorylation at 2.8 mM glucose, which likely explains their ability to synthesize secretory granule protein proforms in these conditions. In contrast, the MIN6-K8 cells had reduced AMPK $\alpha$  phosphorylation only in conditions of 25 mM glucose (**suppl. fig. 5e**), which enabled the glucose-induced biosynthesis of secretory granule proteins (**suppl. fig. 5d**). The combination of the eIF2 $\alpha$  dephosphorylation and AMPK $\alpha$  phosphorylation patterns in resting MIN6-K8 cells suggests that their response to a physiological low glucose concentration (2.8 mM) reflects their nutrient and energy status rather than cell stress, similarly to healthy islet beta cells.

Certain types of stress granules form even in the absence of eIF2 $\alpha$  phosphorylation: hyperphosphorylation of 4E-binding proteins by mTOR disrupts the eIF4E-4G interaction (Sonenberg and Hinnebusch, 2009) and leads to the stalling of the preinitiation complex, which initiates stress granule formation (Panas *et al.*, 2016). We discovered that MIN6 K8 cells rested at 2.8 mM glucose displayed G3BP1<sup>+</sup> and *Ins1* mRNA<sup>+</sup> stress granules, which dissociated upon glucose stimulation (**fig. 5a**). In this cell line, hnRNP A2/B1 was dispersed throughout the whole cell volume regardless of glucose concentration (**fig. 5a**). We confirmed the colocalization of *Ins1* mRNA with the G3BP1<sup>+</sup> stress granules in resting MIN6 K8 cells (**fig. 5a**), which were previously shown to interact in both the MIN6 cells and MIN6-K8 cells (**fig. 1f** and **suppl. fig. 6a**). We verified that hnRNP A2/B1, PTBP1, hnRNP K and DDX1, along with some of the novel RBPs of the 5'-UTRs of mRNA for secretory granule proteins also bind these sequences in the MIN6 K8 cells (**suppl. fig. 6a**).

### RNA granules in primary beta cells

Since MIN6-K8 cells rested in 2.8 mM glucose displayed G3BP1<sup>+</sup> stress granules, we investigated the presence of these structures in primary mouse islet cells. In dispersed mouse islet cells, *Ins1/2* mRNA<sup>+</sup> and G3BP1<sup>+</sup> stress granules were present upon starvation with 0 mM glucose, while in dispersed islet cells incubated with either 3.3 mM or 16.7 mM *Ins1/2* mRNA and G3BP1 were distributed throughout the whole cytoplasm (**fig. 6a**). The threshold for glucose-stimulated insulin biosynthesis is lower than for insulin secretions, which ensures that beta cells always have reserve stores of insulin secretory granules (Ashcroft *et al.*, 1978; Boland *et al.*, 2017). It is possible that the islet cells dissolve stress granules and produce insulin at already 3.3 mM glucose.

Finally, we investigated the presence of stress granules in primary human beta cells. To this aim we exploited pancreas sections of metabolically phenotyped patients who had undergone pancreatectomy (Solimena *et al.*, 2018; Barovic *et al.*, 2019) and co-immunostained them for hnRNP A2/B1 and insulin or glucagon (**fig. 6b** and **suppl. fig. 7a**). Clinical parameters of living donors are shown in **Table 1**. hnRNP A2/B1<sup>+</sup> cytosolic granules were present in the beta cells of three ND and two T2D patients (arrows in **fig. 6** and **suppl. fig. 7**), although in most of the cells hnRNP A2/B1 was restricted to the nucleus, as in the bottom panel of **suppl. fig. 7a**. A small number of the hnRNP A2/B1<sup>+</sup> structures colocalized with G3BP1<sup>+</sup> structures in the sections (**suppl. fig. 7b**). Using RNAscope, we found that *INS* mRNA partially resides in structures similar in size, shape and localization to the hnRNP A2/B1<sup>+</sup> granules (**fig. 6c** and **suppl. fig. 7c**). While in beta cells of some patients *INS* mRNA presented a dispersed pattern (**fig. 6c**), in most cases we could detect *INS* mRNA<sup>+</sup> structures which resembled hnRNP A2/B1<sup>+</sup> granules. The occurrence of hnRNP A2/B1<sup>+</sup> and *INS* mRNA<sup>+</sup> structures did not depend

on the diabetes status of the subjects. Co-staining of *INS* mRNA with hnRNP A2/B1 and stress granule markers was not possible due to technical limitations (Farack *et al.*, 2019). Nonetheless, these findings provide the first evidence for the enrichment of *INS* mRNA in RNA granules in human beta cells, and further research is needed to define their identity and function in health and disease.

## Discussion

Pancreatic beta cells use post-transcriptional mechanisms to regulate insulin and secretory granule biosynthesis, ensuring that new insulin granules can quickly replace the secreted ones. A number of proteins regulate insulin expression (Tillmar *et al.*, 2002; Kulkarni *et al.*, 2011; Lee *et al.*, 2012; Fred *et al.*, 2016) among which PTBP1 and hnRNP K have been suggested to coordinate the biosynthesis of insulin and several other secretory granule proteins (Knoch *et al.*, 2004, 2006, 2014). However, a comprehensive overview of the secretory granule protein mRNPs has been missing. In this study, we determine that under resting conditions, one set of RBPs binds to secretory granule protein mRNAs, which target them for storage in stress granules. Glucose induces RNP remodelling, causing the binding of another set of RBPs to the transcripts, the dissolution of stress granules and a burst in secretory granule protein biosynthesis. Notably, stress granules are also present in human beta cells. Moreover, we determined that hnRNP A2/B1 is a novel factor for control of *Insulin1* mRNA translation.

To our knowledge this is the first study to use an unbiased approach to compare glucose-induced changes in protein binding to mRNAs of insulin secretory granule proteins with the 5'-UTR of a housekeeping mRNA. As such, our findings significantly contribute to the understanding of glucose stimulated post-transcriptional regulation in beta cells. Using *in vitro* RNA pull-downs, we discovered glucose-dependent differences in RBP binding, which could be explained by increased expression of the corresponding RBPs, their nucleocytoplasmic shuttling or glucose-induced post-translational modifications. Among the proteins that were identified by RNA pull-down, we found some of the proteins previously known to regulate insulin expression. In particular, previous studies have shown that mRNAs for secretory granule proteins are co-regulated by PTBP1 (Knoch *et al.*, 2004, 2014) and hnRNP K (our unpublished results). We found that besides PTBP1, six novel RBPs specifically co-bind to the transcripts for secretory granule proteins in resting conditions. We also discovered novel RBPs for these transcripts in stimulated conditions. DDX1, which binds to the insulin mRNA in rat insulinoma INS-1 cells (Li *et al.*, 2018) also interacts with all of the secretory granule protein transcripts that we tested. Additionally, several of the identified proteins have been

associated with neuronal granules (Kanai, Dohmae and Hirokawa, 2004; Elvira *et al.*, 2006) and stress granules (Jain *et al.*, 2016).

In contrast to previous studies, however, we did not detect significant enrichment in the binding of TIAR, HuD, PABP1 or PDI to any of the tested transcripts in MIN6 cells. While all of these studies used a similar methodology for the RNA pull-downs, the conflicting results can be explained by differences in the model system (cell lines vs. islets), the starting material (cytosolic vs. whole cell extracts), the RNA sequence used for pull-down (full length 5'-UTR vs. oligonucleotide segments) and in the identification method (WB vs. MS). Most importantly, each of the previous studies analyzed specific binding to the 5'-UTR of insulin transcripts using different control sequences: a scrambled sequence with the same nucleic acid composition (Fred *et al.*, 2016), a deletion fragment of rat *Ins1* 5'-UTR (Kulkarni *et al.*, 2011), or the 3'-UTR of *Gapdh* mRNA (Lee *et al.*, 2012). While such controls can account for unspecific RNA binding, they are not appropriate for testing how beta cells selectively up-regulate the expression of secretory granule proteins compared to the rest of the cellular proteome. To this aim, we used the full length 5'-UTR of a non-secretory granule protein mRNA to determine the RBPs that differentially regulate secretory granule protein expression compared with other beta cell genes.

Nevertheless, our approach has also several limitations which do not exclude false positive and negative results. First of all, while our assays were designed in a way that limits unspecific binding, the RNA pull-downs were still performed *in vitro*. Therefore, we cannot rule out the formation of non-functional RNA-protein complexes due to post-lysis effects. Additionally, since we previously showed that secretory granule protein mRNAs undergo cap-independent translation, we performed our pull-downs using sequences that did not have a 5'-cap. Accordingly, some proteins binding to the 5'-UTR of  $\gamma$ -tubulin, which is translated in a cap-dependent fashion, might have been missed. Moreover, the UV crosslinking, which was used to stabilize the RNA-protein interactions by forming covalent bonds could enable the retention of unspecific proteins, even after stringent washing. Furthermore, UV cross-linking only links direct RNA-protein contact and may not capture the larger multi-protein complexes that make up the overall RNP architecture *in vivo*. Finally, since we controlled for unspecific binding using the 5'-UTR of a housekeeping mRNA, it is possible that RBPs which specifically bind and regulate both control and target mRNAs would be classified as background. In the future, the integration of aptamer sequences, e.g., the S1 streptavidin binding aptamer, into the target transcripts could enable the purification of *in vivo* crosslinked RNA-protein complexes and overcome the limitations of this study.

A novel interacting partner identified in our screen is hnRNP A2/B1, which is one of the seven enriched RBPs shared among the mRNAs for secretory granule proteins in resting conditions. We discovered that the 5'-UTRs of transcripts for secretory granule proteins contain putative A2REs and verified that the binding of hnRNP A2/B1 decreases upon the mutation of these elements in the *Ins1* mRNA 5'-UTR. The A2RE motif does not overlap with the exon-exon junction site in the *Ins1* mRNA 5'-UTR, suggesting that hnRNP A2/B1 is not involved in splicing within the 5'-UTR of this transcript. The mutation of the A2REs reduced the translational efficiency of a downstream luciferase reporter, although there were no differences in luciferase intensity between resting and stimulated cells, which confirms previous results that both the 5'- and 3'-UTR cooperate to increase glucose stimulated insulin biosynthesis (Wicksteed *et al.*, 2001).

In mouse beta cells most insulin results from the translation of *Ins2* mRNA (Wentworth *et al.*, 1992). In our MIN6 cells *Ins2* mRNA is twice as abundant as *Ins1* mRNA. In *Hnrnpa2b1* KO MIN6 cells the insulin protein content was significantly reduced, although only the levels of *Ins1* mRNA were decreased, while those of *Ins2* mRNA were unchanged. Glucose stimulation upregulated insulin biosynthesis in both *WT* and *Hnrnpa2b1* KO cells, as indicated by the increased amount of intracellular proinsulin. However, proinsulin levels in *Hnrnpa2b1* KO cells were significantly lower. Hence, it is conceivable that *Hnrnpa2b1* regulates *Ins1* mRNA stability and *Ins2* mRNA translation and that a combination of both mechanisms accounts for reduction in insulin protein content in its absence. Interestingly, the nucleotide sequences of the *Ins1* and *Ins2* mRNAs differ mainly in their 5'-UTRs.

RNA pull-down assays indicated the binding of hnRNP A2/B1 to *Pc2* and *Ica512/Ptprn* mRNA 5'-UTRs, which contain putative A2REs. However, its deletion affected neither mRNA nor protein levels of PC2 and ICA512. Additionally, glucose stimulation increased the proforms of these proteins to a similar extent in both *WT* and *Hnrnpa2/b1* KO cells. Thus, it seems that beta cells rely on a fail-safe mechanism to support secretory granule production even in the absence of hnRNP A2/B1. Consistent with this hypothesis, we found that the levels of hnRNP A1 were increased in *Hnrnpa2/b1* KO MIN6 cells were increased compared with wild-type cells. hnRNP A2/B1 is structurally and functionally similar to its paralogue hnRNP A1, which was also among the common enriched RBPs for the 5'-UTRs of secretory granule protein mRNAs. Possibly increased hnRNP A1 expression can compensate for the loss of hnRNP A2/B1 and enable beta cells to sustain the biosynthesis of PC2, PC1/3 and ICA512, albeit not that insulin.

Interestingly, we discovered that hnRNP A2/B1 and the *Ins1* mRNA localize to stress granules in the cytoplasm of resting insulinoma cells, which dissolve upon glucose stimulation. While



the presence of stress granules has been previously observed in thapsigargin-treated rat insulinoma INS-1 cells (Fred *et al.*, 2016), to our knowledge, this is the first time RNA granules are reported to have a physiological function in beta cells. Although MIN6 and MIN6-K8 cells differ in the presence of hnRNP A2/B1 in stress granules, G3BP1<sup>+</sup> RNA granules were present in both cell types at their respective “low glucose” concentrations and colocalized with *Ins1* mRNA. Notably, hnRNP A2/B1, eIF3b and G3BP1 localize to stress granules, but they have also been linked to RNA granules independent of a stress stimulus. For instance, in neurons and oligodendrocytes, hnRNP A2/B1 regulates the cytoplasmic transport of a set of mRNAs by sequestering them into RNA granules. Once these reach their final destination, hnRNP A2/B1 fosters translation in response to stimuli (i.e. synaptic transmission) (Ainger *et al.*, 1997; Munro *et al.*, 1999; Smith, 2004).

In surgical samples of metabolically phenotyped pancreactomized patients with normoglycemia or T2D, we detected hnRNP A2/B1<sup>+</sup> and *INS*<sup>+</sup> RNA granules in the cytoplasm of human beta cells. These data provide first evidence for the presence of RNA granules in primary human beta cells. Due to technical limitations, we were unable to simultaneously label FFPE sections for hnRNP A2/B1 and *INS* mRNA. Intriguingly, we could not reveal differences for the presence of RNA granules in beta cells of subjects with T2D relative to normoglycemic donors. Since these patients were fasted overnight prior to surgery, and may also be differently treated with glucose and/or insulin during the prolonged surgical procedure, we cannot draw conclusions regarding possible differences about RNA granules in relation to glucose tolerance. However, given the lower levels of G3BP1 mRNA in islets of donors with T2D (Wigger *et al.*, 2020), this scenario deserves to be considered further.

In general, there is emerging evidence about the role of RBPs in beta cell dysfunction. PTBP1 has been linked to beta cell dysfunction in human islets (Ehehalt *et al.*, 2010; Fred *et al.*, 2010) and polymorphisms in *PTBP1* have been associated with reduced glucose tolerance (Heni *et al.*, 2012). DDX1 has been linked to the palmitate-feeding induced reduction in insulin translation in mouse islets. Neurodegenerative diseases, such amyotrophic lateral sclerosis, frontotemporal dementia and multiple sclerosis have been linked to the formation of pathological inclusions, where mutations in RBPs alter stress granule dynamics, compromising the gene expression profile and cell function (Kim *et al.*, 2013; Patel *et al.*, 2015; Douglas *et al.*, 2016; Mandrioli *et al.*, 2019; Xue *et al.*, 2020; Clarke *et al.*, 2021). Notably, while hnRNP A2/B1 has not yet been associated with T2D, mutations in its prion-like domain can cause abnormal protein aggregation and the formation of amyloid plaques in amyotrophic lateral sclerosis (Kim *et al.*, 2013).



As a sensor of nutrient status, AMPK $\alpha$  phosphorylation in conditions of low nutrient availability initiates stress granule formation through the mTOR-4E-BP pathway (Panas *et al.*, 2016). AMPK inhibition through dephosphorylation of Thr172 in the AMPK $\alpha$  subunit in glucose-stimulated beta cells has been well studied in mouse, rat and human islets (Szkudelski and Szkudelska, 2019). We demonstrated this in MIN6 cells (**suppl. fig. 5d and 5e**). Previous studies show that AMPK inhibition in stimulated beta cells augments insulin secretion (Tsuboi *et al.*, 2003), albeit AMPK $\alpha$  dephosphorylation happens at a glucose concentration that does not initiate insulin secretion (Leclerc *et al.*, 2004), but, presumably, can initiate insulin biosynthesis (Ashcroft *et al.*, 1978; Boland, Rhodes and Grimsby, 2017). In models of diet induced obesity, glucose stimulation failed to inhibit AMPK activation in islets from high-fat fed mice (Pepin *et al.*, 2016). In human islets, diabetogenic conditions did not alter AMPK expression, but chronic fructose exposure increased pAMPK levels to fasting levels (Brun *et al.*, 2020) and AMPK activation was reduced in T2D islet donors compared to ND controls (Del Guerra *et al.*, 2005). Here, we link AMPK $\alpha$  inactivation with insulin biosynthesis. These data, in conjunction with our discovery of hnRNP A2/B1<sup>+</sup> stress granules in human islets warrants further investigation into the post-transcriptional mechanism regulating insulin expression.

A hallmark of T2D is impaired beta cell function and insulin secretion. In our model, deletion of a RBP which regulates insulin biosynthesis resulted in decreased insulin secretion, even though the insulin stimulation index of WT and *Hnnpa2b1* KO cells was comparable. Similarly, depletion of *Ptbp1* in INS1 cells reduced glucose-stimulated biosynthesis of secretory granules and their stores (Knoch *et al.*, 2014). Also, some monogenetic forms of diabetes are caused by mutations in factors promoting translation, such as CDKAL1 and TRMT10 (Vasiljević *et al.*, 2020). Taken together, these data point to deficits in insulin biosynthesis as possible causes of diabetes, even though the secretory machinery of beta cells is intact. Further studies on the role of RBPs and stress granules for post-transcriptional regulation of mRNAs coding for secretory granule proteins will therefore contribute to the understanding of beta cell physiology in healthy and pathological conditions.

### Author contributions

Conceptualization: J.V., M.S.; Methodology: J.V., Dj.V.; Validation: J.V.; Formal analysis: J.V., Dj.V.; Investigation: J.V., Dj.V., K.G., E.D.Q.D.; Resources: C.W., C.M., A.S., E.S., D.F., N.K., M.D. M.S.; Writing - Original Draft: J.V.; Writing - Reviewing & Editing: J.V., Dj.V., M.S.; Visualization: J.V.; Supervision: M.S.; Funding Acquisition: J.V., M.S.

## **Acknowledgments**

We would like to thank Martin Neukam for the detailed reading of the manuscript and optimizing islet dispersion, Katja Pfriem for administrative assistance and members of the Solimena lab for their feedback and discussion. The work in the Soliman lab was supported by the German Center for Diabetes Research (DZD e.V.), which is financed by the German Ministry for Education and Research.

## **Competing interests statement**

The authors declare no competing interests.

## Materials and Methods

### Cell culture and islet culture

Subclones of the MIN6 mouse insulinoma cell line were grown in DMEM high Glucose medium (4,5g/l Glucose with L-Glutamine and with Pyruvate) supplemented with 15% FBS, 100 U/ml penicillin, 100 mg/ml streptomycin and 70 mM 2-Mercaptoethanol. For stimulation, cells were first pre-incubated in resting medium (15 mM HEPES, pH 7.4, 5 mM KCl, 350 mM NaCl, 24 mM NaHCO<sub>3</sub>, 1 mM MgCl<sub>2</sub>, 2 mM CaCl<sub>2</sub>, 0 mM/2.8 mM glucose, 1 mg/ml ovalbumin) for 1 h at 37 °C. The media were changed to either resting or stimulation medium (15 mM HEPES, pH 7.4, 25 mM glucose, 5 mM KCl, 120 mM NaCl, 24 mM NaHCO<sub>3</sub>, 1 mM MgCl<sub>2</sub>, 2 mM CaCl<sub>2</sub>, 25 mM glucose, 1 mg/ml ovalbumin) and the cells were incubated for an additional 2 h at 37 °C. Transfections were performed using the G16 program of the Amaxa™ Cell Line Nucleofector™ Kit V (Lonza AG), following the manufacturer's instructions.

Pancreatic islets were isolated from C57BL/6 mice, dispersed and cultured as previously described (Phelps *et al.*, 2017) with minor adjustments, namely the use of accutase instead of trypsin and the coverslips being coated with ECM (Sigma, E1270). The dispersed islets were incubated in resting medium with the appropriate glucose concentration for 2 h.

### Cell extract preparation

Cells were washed once and scraped in ice-cold Dulbecco's PBS, pelleted by centrifugation (1200 rpm, 10 min at 4°C), and then lysed in lysis buffer (20 mM Tris-HCl pH 8.0, 140 mM NaCl, 1 mM EDTA, 1% v/v Triton X-100, 1X protease inhibitor cocktail P8340 (Sigma-Aldrich Chemical Co.), 1X phosphatase inhibitor cocktail (Merck Chemicals)), unless otherwise stated. Cell lysates were incubated 30 min on ice and centrifuged at 16400 rpm for 10 min at 4°C to pellet insoluble material. Supernatants were transferred to new tubes and protein concentration was measured using the BCA™ Protein Assay Kit (Thermo Fisher Scientific Inc.) according to the manufacturer's instructions. Nuclear and cytosolic extracts were prepared using the NE-PER™ Nuclear and Cytoplasmic Extraction Reagents kit (Thermo Scientific).

### *In vitro* transcription and biotinylation

The 5'-UTRs of transcripts were amplified from MIN6 cell cDNA using a T7 promotor sequence fused to the 5'-end of the forward primer and cloned into pCRII using the TOPO™ TA Cloning™ Kit, Dual Promoter (Invitrogen) according to the manufacturer's instructions. The T7-5'UTRs were amplified from the corresponding pCRII plasmid and used as templates for *in vitro* transcription. For spliced *Ins2* 5'-UTR mRNA, complementary oligos were annealed and used as templates. The reactions were performed using the AmpliScribe™ T7-Flash™

RNA transcription kit (Ambion) and biotin-16-CTP (Roche) in accordance with the manufacturer's instructions. RNA was precipitated with phenol/chloroform extraction and purified using NucAway Spin Columns (Invitrogen). The RNA products were visualized by denaturing RNA gel electrophoresis.

### **RNA-pull down**

100  $\mu$ l Dynabeads® M-280 Streptavidin (Invitrogen) were washed in binding buffer (20 mM HEPES pH 7.4, 50 mM EDTA, 5% glycerol, 50 mM KCl, 3 mM MgCl<sub>2</sub>, 1 mM DTT) and rotated at 4 °C for 1 h with 400 pmol of biotinylated RNA and 20U of SUPERase RNase inhibitor (Invitrogen). Cytosolic protein lysates from MIN6 cells were precleared with 20  $\mu$ g yeast tRNA (Ambion) and 50  $\mu$ l Dynabeads by rotating at 4 °C for 1 h. The RNA-bound beads were washed twice in binding buffer and incubated with 125 - 800  $\mu$ g of precleared protein extracts, 20U RNase inhibitor, 20  $\mu$ g yeast tRNA, 5  $\mu$ l protease inhibitors and 5  $\mu$ l phosphatase inhibitors in RNA-binding buffer with a total volume of 500  $\mu$ l, as triplicates. The binding was performed at 4 °C for 2 h with rotation. Protein-RNA interactions were stabilized by UV irradiation for 30 min in the UVC 500 UV crosslinker (Amersham). After UV crosslinking, the beads were washed three times in 500  $\mu$ l RNA binding buffer with 0.05% Triton X-100 and two times in RNA-binding buffer. Proteins were eluted by digesting the RNA with 3  $\mu$ g RNase A (Roche) and 30U RNase T1 (Roche) in 400  $\mu$ l RNA binding buffer with 4  $\mu$ l protease inhibitors. The RNA digestion was carried out overnight with the beads rotating at 4 °C. Eluates were transferred to new tubes and precipitated overnight with 100% ethanol. Pellets were dissolved in 1X SDS buffer and loaded on SDS-PAGE or prepared for MS analysis.

### **RNA-IP**

MIN6 cells were grown in 10 cm dishes until 80% confluent and UV crosslinked for 10 min in the UVC 500 UV crosslinker (Amersham). Cell pellets were dissolved in RNA lysis buffer (50 mM Tris-HCl, pH 7.5, 100 mM NaCl, 6mM MgCl<sub>2</sub>, 1% NP-40, 0.1 % SDS, 0.5% sodium deoxycholate, 1:100 protease inhibitors, 20 U/ml SUPERase RNase inhibitor) and homogenized by passing through a 20G needle. The lysates were incubated for 15 min on ice and treated with DNase I for 15 min at room temperature. Lysates were centrifuged for 10 min at 16400 rpm, 4 °C and supernatants were precleared with Protein G Dynabeads and 5  $\mu$ g mouse IgG, rotating at 4 °C for 1 h, after which protein concentration was measured and 1/10 of the sample was removed for total RNA and protein input. IPs were performed in IP buffer (50 mM Tris, 100 mM NaCl, 0.05% NP-40, 20U SUPERase RNase inhibitor, 1:100 protease inhibitors) with 500  $\mu$ g protein and 10  $\mu$ g of anti-hnRNP A2/B1 from Santa Cruz Biotechnology Inc. (sc-374053) or mouse IgG antibody from Jackson ImmunoResearch Lab (015-000-003). The samples were incubated for 2 h, rotating at 4 °C, after which 100  $\mu$ l Protein G Dynabeads

were added and incubated for an additional hour. The samples were washed twice in high-salt buffer (50 mM Tris-HCl, pH 7.5, 1 M NaCl, 1mM EDTA, 0.1% SDS, 1% NP-40) and twice in RNA lysis buffer, rotating for 2 min for each wash. The beads were resuspended in 500 µl proteinase K buffer (5 mM Tris-HCl, pH 7.5, 1 mM EDTA, 0.05 % SDS, 20 U SUPERase RNase inhibitor) and 1/5 of the sample was taken to check the IP by Western blot. 4.2 µl of proteinase K (20 mg/ml stock) was added and the samples were incubated for 90 min at 50 °C. RNA was extracted by phenol/chloroform and precipitated with ethanol. Pellets were resuspended in 12 µl DEPC water, 2 µl of which was used for reverse transcription and subsequent qPCR, as described in the methods.

### **CRISPR/Cas9 knock-out**

Guide RNA (gRNA) sequences specifically targeting the mouse *Hnrnpa2b1* gene sequence were designed using the online CRISPR design tool available at <http://crispr.mit.edu/>. A 20 nt long high-quality guide sequence with a low number of potential off target effects was chosen based on the proximity to the Cas9 cleavage site to the start codon. Complementary oligos were designed with overhangs that enable ligation into the BbsI-digested pSpCas9(BB)-2A-Puro plasmid. The oligo sequences were: ACCGAGTCCGCGATGGAGGTAAC and AAACGTTACCTCCATCGCGGACTC. Selection of transfected cells was achieved by adding puromycin to the culture medium, which was maintained in the media for further culturing. Single cells were plated by limited dilution and expanded until confluent. Clones were screened for hnRNP A2/B1 expression by Western blot and editing was confirmed with sequencing.

### **Western blot**

Non-denaturing TRIS-Tricine gels were used for visualization of insulin, all other proteins were separated and immunoblotted using standard SDS-PAGE and Western blot techniques. The following primary antibodies were used: anti-PTBP1 from Invitrogen Corp. (32-4800), anti-hnRNP K from Santa Cruz Biotechnology Inc. (sc-28380), anti-hnRNP A2/B1 from Santa Cruz Biotechnology Inc. (sc-374053), anti-hnRNP A2/B1 from Sigma Aldrich Chemical Co. (R4653), anti-G3BP1 from abcam (ab181150), anti-Insulin from Sigma-Aldrich Chemical Co. (I-2018), anti-p-eIF2α from Signaling Technology (#9721), anti-eIF2α from Signaling Technology (#9722), anti-PC1/3 from GeneTex (GTX113797), anti-ICA512 (self-raised) anti-p-AMPK from Cell Signaling Technology (#2531), anti-AMPK from Cell Signaling Technology (#2532), anti-DDX1 from LS Bio (LS-C334806), anti-hnRNP Q from Proteintech (14024-1-AP), anti-Fxr1 from Thermo Fisher (702410), anti-RPS6 from (#2212) Cell Signaling Technology, anti-hnRNP A1 from Sigma-Aldrich Chemical Co. (R4528), anti-PC2 from GeneTex (GTX114625), anti-gamma-tubulin from Sigma (T-6557). Secondary HRP-conjugated antibodies were from

Bio-Rad, except for IP samples, where anti-mouse light chain specific HRP-conjugated antibodies (Dianova) were used to avoid interference from the heavy chain of the precipitated IgG. Nitrocellulose membranes were developed with SuperSignal West Pico Chemiluminescent Substrate or SuperSignal West Femto Maximum Sensitivity Substrate (Thermo Fisher Scientific) according to the manufacturer's instructions. Bands were detected using the Amersham Imager 600 (GE Healthcare). Band intensity was quantified using ImageStudioLite (Li-COR) and normalized to that of the loading control ( $\gamma$ -tubulin).

## ELISA

After glucose stimulation, media was collected and the cells were washed twice in PBS, scraped in acid ethanol. All samples were stored at  $-20^{\circ}\text{C}$  until use. Insulin and proinsulin were measured using the Insulin ELISA kit (ALPCO) and proinsulin ELISA kit, respectively, according to the manufacturer's instructions. DNA was precipitated from the acid ethanol samples and used for normalization.

## RNA isolation and qPCR

Total RNA was isolated using the RNeasy Mini Kit (Qiagen Inc.) including the on-column DNase digestion step with the RNase-Free DNase Set (Qiagen Inc.). One  $\mu\text{g}$  RNA was reverse transcribed using the MLV RT kit (Promega). The GoTaq<sup>®</sup> qPCR Master Mix (Promega) was used according to manufacturer's instructions and the samples were run in triplicate on the AriaMx Real-time PCR System (Agilent). Relative quantification was performed using the  $2^{-\text{ddct}}$  method. Reference gene selection was achieved by testing the expression stability of the following housekeeping genes:  $\beta$ -actin,  $\gamma$ -tubulin,  $\beta 2$ -microglobulin, *HPRT* and *TBP*. The most stable reference gene was determined for each experiment using the RefFinder (Xie *et al.*, 2012).

## Immunofluorescence

For immunofluorescence, cells were grown on coverslips using standard culture conditions. The cells were fixed with 4% PFA for 20 min at room temperature and permeabilized in 0.1% Triton X-100 in PBS for 10 min at room temperature. Coverslips were incubated with blocking buffer (0.5% BSA, 0.2% fish skin gelatine solution in PBS, filter sterilized) for 30 min, primary antibodies diluted in blocking buffer for 30 min, and finally AlexaFluor-coupled secondary antibodies (1:200) from the appropriate host species. Double stainings were performed with primary antibodies from different host species; nuclei were counterstained with DAPI. Coverslips were mounted on glass slides using Mowiol (24% w/v glycerol, 9.6% w/v mowiol, 96 mM Tris-HCl pH 8.5, 2.5% DABCO). Primary antibodies used were: anti-hnRNP A2/B1 from Santa Cruz Biotechnology Inc. (sc-374053), anti-G3BP1 from abcam (ab181150), anti-

Insulin from Sigma-Aldrich Chemical Co. (I-2018), anti-eIF3b from Santa Cruz Biotechnology Inc. (sc-137214), and anti-Dcp1a from abcam (ab183709). For RNase treatment prior to IF and FISH, the cells were incubated with 0.05% Triton X-100 for 5 min at room temperature and then for 10 min with 0.2 mg/ml RNase A in 10 mM Tris-HCl, pH 7.5/15 mM NaCl for 10 min, prior to fixation.

### **Fluorescent *in situ* hybridization (FISH)**

FISH probes were designed using the Stellaris Probe Designer tool. The probes were BLASTed to check specificity: if more than 5 probes bound to a non-target gene with 16 nt or more, they were removed from the probe set. The mouse *GAPDH* probe set from Stellaris was used as a positive control. Cells were grown on coverslips, fixed in 4% PFA and permeabilized with 0.1% Triton X-100. Probe hybridization was performed according to the manufacturer's instructions. When combining FISH with IF, the IF was performed first, after which the cells were fixed for 10 min in 4% PFA and hybridized to FISH probes overnight.

### **Confocal microscopy**

Images were acquired with a confocal laser scanning Zeiss LSM 780 microscope (Carl Zeiss AG) equipped with a 63x/1.46 Oil DIC (Plan-Apochromat) objective. Image acquisition was done in the sequential scanning mode using the ZEN software, with a line averaging of 2. Optical sections were taken throughout the whole z-volume of the cells, with a z-step size set to half of the optical section thickness. Microscopy images were processed using Fiji. Background fluorescence intensity was measured using an ROI and the average intensity value was subtracted from the full image. Maximum intensity projections are shown. If modified, the brightness and contrast settings were adjusted for the whole image, with identical settings for all images within one experiment. Colocalization analysis was performed on background subtracted maximum intensity projections using the Coloc2 Fiji plugin.

### **Luciferase assays**

The Rosa26 promotor and the 5'UTRs of secretory granule protein transcripts were subcloned into the pNL1.1 (Promega) using standard cloning techniques. Mutagenesis of the A2REs in the *Ins1* 5'-UTR was performed with the QuikChange II Site-directed mutagenesis kit (Agilent). Cells were co-transfected with each pNL1.1 construct and the pGL4.54 for normalization. Cells were lysed in Glo Lysis Buffer (Promega) four days after transfection and luciferase activity was measured using the Nano-Glo® Dual-Luciferase® Reporter Assay System using the Synergy Neo2 multi-mode reader (BioTek). Nanoluciferase activity was normalized to that of the firefly luciferase.



## Staining of human pancreas sections

Surgical pancreas tissue from metabolically profiled, partially pancreatectomized living human donors used in this study were obtained from the IMIDIA biobank and have been previously described (Solimena *et al.*, 2018; Wigger *et al.*, 2020). 5 µm FFPE sections were mounted on microscope slides and prepared using standard procedures; antigen retrieval was performed by boiling the samples in citrate buffer with 1% Tween20 for 3 min. Sections were blocked using Dako Antibody diluent. Primary and secondary antibody incubation was performed in Dako Antibody diluent for 1 hour. Nuclei were counterstained with DAPI and coverslips mounted with Mowiol. anti-hnRNP A2/B1 from Santa Cruz Biotechnology Inc. (sc-374053), anti-G3BP1 from Proteintech (13057-2-AP), Anti-Insulin Alexa Fluor® 488 from Invitrogen (53-9769-82), anti-eIF3b from Santa Cruz Biotechnology Inc. (sc-137214). For FISH, *INS* mRNA specific probes were used with the RNAscope® Multiplex Fluorescent Assay Kit (Advanced Cell Diagnostics), according to the manufacturer's instructions.

## Sample prep for MS

Pellets from RNA pull-downs were solubilized in 50 µl denaturation buffer (6 M urea, 2 M thiourea, 50 mM ABC, pH 8.5), reduced by addition of 2 µl DTT (10 mM) and incubated for 30 min at room temperature in a shaker. For alkylation of cysteines, 5 µl of 55 mM iodoacetamide were added and samples were incubated in the dark for 20 min at room temperature with shaking. The samples were kept in the dark for all subsequent steps. The samples were pre-digested by adding 1 µg of LysC endopeptidase and incubated for 3 h at room temperature with shaking. Samples were then diluted four times with 50 mM ABC, pH 8.5. Digestion was performed overnight at room temperature in a shaker by addition of 1 µg Trypsin. The reaction was stopped by acidification of the sample to pH < 2.5 with 10% trifluoroacetic acid (TFA). The peptides were desalted and concentrated on a StageTip (Stop and go extraction Tip) containing 3 disks of C18 reverse-phase material (Empore, 3M, Minneapolis, USA). StageTips were activated and then washed by forcing 100 µl of pure methanol and 100 µl of buffer A\* (5% acetonitrile, 3% TFA in water) respectively through the C18 discs. Peptide solutions were loaded on StageTips and centrifuged at 3,000 x g, and washed twice with 100 µl of buffer A (5% acetonitrile, 0.1% formic acid in water). For LC-MS measurement, peptides were eluted from StageTips by forcing 60 µl of buffer B (80% acetonitrile, 0.1% formic acid) directly into a 96-well microtiter plate. Eluted peptide solutions were dried in a speed vac to a volume of 3-4 µl and 5 µl of buffer A was added to each sample.

## LC-MS acquisition and post-acquisition workflow

Peptides from each sample were separated by reverse phase liquid chromatography on a 20 cm fritless silica microcolumn (inner diameter 75 µm) packed in-house with ReproSil-Pur C18

3  $\mu$ m resin (Dr. Maisch GmbH, Ammerbuch, Germany) using the Proxeon 1000 system (Thermo Scientific). Peptides were separated on an 8-50% acetonitrile gradient with 0.1% formic acid, during 155 min with a flow rate of 250 nl/min. Eluting peptides were directly ionized by electrospray ionization at 2.2 kV and transferred into a Q Exactive Plus Quadrupole-Orbitrap hybrid mass spectrometer (Thermo Scientific).

Mass spectrometry was conducted in a data-dependent mode with full scan (MS1) followed by 10 fragmentation scans (MS2) of the 10 most intense ions. MS1 scans were performed in a 300-1,700 m/z range at the resolution of 70,000 and target value of  $3 \times 10^6$ . MS/MS scans were performed with higher energy collision (HCD), normalized energy 26%, isolation width  $\pm 4$  m/z, target value  $2 \times 10^5$ , maximum injection time 120 ms and resolution of 35,000. Dynamic exclusion was set to 30 s and unassigned or +1 charge states were rejected for isolation.

Raw data were processed using MaxQuant software (version 1.5.1.2) (Cox and Mann, 2008) with the built-in Andromeda search engine. Search was performed against the mouse proteome database (Uniprot, 2014), using the target-decoy approach. Reversed peptide sequences with K and R as special amino acids was chosen as the decoy strategy. By default, common contaminants were included in the search. Carbamidomethylation of cysteine was set as a fixed modification, while oxidation of methionine and acetylation of protein N-terminus were set as variable modifications. Digestion mode was set to Trypsin/P specific, minimum peptide length was 7 amino acids and maximum 2 missed cleavage sites were allowed. False discovery rate (FDR) was set to 0.01 for both peptide and protein identification. The “match between runs” option was chosen for transferring MS/MS identifications with the maximal retention time tolerance of 2 min. Protein quantification was performed using the label-free quantification (LFQ) algorithm (Cox *et al.*, 2014), where a minimum of 2 LFQ ratio counts was required. Raw data have been uploaded to the PRIDE repository and is available upon request.

The Perseus software (Tyanova *et al.*, 2016) was used for statistical analysis and graphical representation of proteomics data. The proteinGroups.txt-file is loaded into Perseus with LFQ intensities marked as “expression.” Proteins were filtered for “contaminants”, “reverse” and “identified by site” and proteins that were not detected in at least two replicates of at least one group were deleted. Values were log2 transformed and the missing values were imputed separately for each column from a normal distribution with a width of 0.3 and downshift of 1.8. LFQ intensities were statistically analysed using a permutation-based t-test with an FDR of 5% and slope of 0.2. Volcano plots were created with the “-log t-test p-value” versus the “t-test difference” (fold change).

## References

- Advani, V. M. and Ivanov, P. (2020) 'Stress granule subtypes: an emerging link to neurodegeneration', *Cellular and Molecular Life Sciences*. Springer, pp. 1–19. doi: 10.1007/s00018-020-03565-0.
- Ainger, K. *et al.* (1997) 'Transport and localization elements in myelin basic protein mRNA.', *The Journal of cell biology*. The Rockefeller University Press, 138(5), pp. 1077–87. Available at: <http://www.ncbi.nlm.nih.gov/pubmed/9281585> (Accessed: 10 January 2019).
- Ashcroft, S. J. *et al.* (1978) 'The effect of sugars on (pro)insulin biosynthesis.', *The Biochemical journal*, 174(2), pp. 517–26. doi: 10.1042/bj1740517.
- Barovic, M. *et al.* (2019) 'Metabolically phenotyped pancreatectomized patients as living donors for the study of islets in health and diabetes', *Molecular Metabolism*. Elsevier GmbH, pp. S1–S6. doi: 10.1016/j.molmet.2019.06.006.
- Boland, B. B., Rhodes, C. J. and Grimsby, J. S. (2017) 'The dynamic plasticity of insulin production in  $\beta$ -cells', *Molecular Metabolism*. Elsevier GmbH, pp. 958–973. doi: 10.1016/j.molmet.2017.04.010.
- Brun, T. *et al.* (2020) 'AMPK profiling in rodent and human pancreatic beta-cells under nutrient-rich metabolic stress', *International Journal of Molecular Sciences*. MDPI AG, 21(11). doi: 10.3390/ijms21113982.
- Clarke, J. P. W. E. *et al.* (2021) 'Multiple sclerosis-associated hnrnpa1 mutations alter hnrnpa1 dynamics and influence stress granule formation', *International Journal of Molecular Sciences*. MDPI AG, 22(6), pp. 1–22. doi: 10.3390/ijms22062909.
- Cox, J. *et al.* (2014) 'Accurate proteome-wide label-free quantification by delayed normalization and maximal peptide ratio extraction, termed MaxLFQ', *Molecular and Cellular Proteomics*. American Society for Biochemistry and Molecular Biology Inc., 13(9), pp. 2513–2526. doi: 10.1074/mcp.M113.031591.
- Cox, J. and Mann, M. (2008) 'MaxQuant enables high peptide identification rates, individualized p.p.b.-range mass accuracies and proteome-wide protein quantification', *Nature Biotechnology*. Nat Biotechnol, 26(12), pp. 1367–1372. doi: 10.1038/nbt.1511.
- Davidson, H. W. and Hutton, J. C. (1987) 'The insulin-secretory-granule carboxypeptidase H. Purification and demonstration of involvement in proinsulin processing.', *The Biochemical journal*. Portland Press Ltd, 245(2), pp. 575–82. Available at: <http://www.ncbi.nlm.nih.gov/pubmed/2822027> (Accessed: 10 January 2019).
- Douglas, J. *et al.* (2016) 'Antibodies to the RNA Binding Protein Heterogeneous Nuclear Ribonucleoprotein A1 Colocalize to Stress Granules Resulting in Altered RNA and Protein Levels in a Model of Neurodegeneration in Multiple Sclerosis', *Journal of Clinical & Cellular Immunology*. OMICS Publishing Group, 07(02), p. 402. doi: 10.4172/2155-9899.1000402.
- Ehehalt, F. *et al.* (2010) 'Impaired insulin turnover in islets from type 2 diabetic patients', *Islets*, 2(1), pp. 30–36. doi: 10.4161/isl.2.1.10098.
- Elvira, G. *et al.* (2006) 'Characterization of an RNA granule from developing brain', *Molecular and Cellular Proteomics*. American Society for Biochemistry and Molecular Biology Inc., 5(4), pp. 635–651. doi: 10.1074/mcp.M500255-MCP200.
- Farack, L. *et al.* (2019) 'Transcriptional Heterogeneity of Beta Cells in the Intact Pancreas', *Developmental Cell*. Cell Press, 48(1), pp. 115–125.e4. doi: 10.1016/j.devcel.2018.11.001.
- Fred, R. G. *et al.* (2010) 'High Glucose Suppresses Human Islet Insulin Biosynthesis by Inducing miR-133a Leading to Decreased Polypyrimidine Tract Binding Protein-Expression', *PLoS ONE*. Edited by M. F. Tuite. Public Library of Science, 5(5), p. e10843. doi: 10.1371/journal.pone.0010843.
- Fred, R. G. *et al.* (2016) 'PTB and TIAR binding to insulin mRNA 3'- and 5'UTRs; implications for insulin biosynthesis and messenger stability', *Heliyon*. Elsevier Ltd, 2(9), pp. 1–26. doi: 10.1016/j.heliyon.2016.e00159.
- Gao, Y. *et al.* (2008) 'Multiplexed dendritic targeting of  $\alpha$  calcium calmodulin-dependent protein kinase II, neurogranin, and activity-regulated cytoskeleton-associated protein RNAs by the A2 pathway', *Molecular Biology of the Cell*. American Society for Cell Biology, 19(5), pp. 2311–2327. doi: 10.1091/mbc.E07-09-0914.

- Gerstberger, S., Hafner, M. and Tuschl, T. (2014) 'A census of human RNA-binding proteins', *Nature Reviews Genetics*. Nature Publishing Group, 15(12), pp. 829–845. doi: 10.1038/nrg3813.
- Gräwe, C. *et al.* (2020) 'RNA-Centric Methods: Toward the Interactome of Specific RNA Transcripts', *Trends in Biotechnology*. Elsevier Ltd. doi: 10.1016/j.tibtech.2020.11.011.
- Del Guerra, S. *et al.* (2005) 'Functional and molecular defects of pancreatic islets in human type 2 diabetes', *Diabetes*. American Diabetes Association, 54(3), pp. 727–735. doi: 10.2337/diabetes.54.3.727.
- Guest, P. C. *et al.* (1991) 'Insulin secretory granule biogenesis. Co-ordinate regulation of the biosynthesis of the majority of constituent proteins', *The Biochemical Journal*, 274 ( Pt 1, pp. 73–78. doi: 10.1042/bj2740073.
- Guest, P. C., Rhodes, C. J. and Hutton, J. C. (1989) 'Regulation of the biosynthesis of insulin-secretory-granule proteins. Co-ordinate translational control is exerted on some, but not all, granule matrix constituents.', *The Biochemical journal*, 257(2), pp. 431–7. Available at: <http://www.ncbi.nlm.nih.gov/pubmed/2649074> (Accessed: 31 July 2018).
- Hammonds, P. *et al.* (1987) 'Regulation and specificity of glucose-stimulated insulin gene expression in human islets of Langerhans', *FEBS letters*, 223(1), pp. 131–137. Available at: [papers://a227be8a-4420-4183-af98-906cc45b0bf3/Paper/p2619](https://pubmed.ncbi.nlm.nih.gov/papers/a227be8a-4420-4183-af98-906cc45b0bf3/Paper/p2619).
- Henri, M. *et al.* (2012) 'Polymorphism rs11085226 in the Gene Encoding Polypyrimidine Tract-Binding Protein 1 Negatively Affects Glucose-Stimulated Insulin Secretion', *PLoS ONE*, 7(10), pp. 1–7. doi: 10.1371/journal.pone.0046154.
- Henquin, J.-C. (2021) 'Glucose-induced insulin secretion in isolated human islets: Does it truly reflect  $\beta$ -cell function in vivo?', *Molecular Metabolism*. Elsevier BV, 48, p. 101212. doi: 10.1016/j.molmet.2021.101212.
- Itoh, N. and Okamoto, H. (1980) 'Translational control of proinsulin synthesis by glucose [33]', *Nature*, pp. 100–102. doi: 10.1038/283100a0.
- Ivanova, A. *et al.* (2013) 'Age-dependent labeling and imaging of insulin secretory granules.', *Diabetes*. American Diabetes Association, 62(11), pp. 3687–96. doi: 10.2337/db12-1819.
- Iwasaki, M. *et al.* (2010) 'Establishment of new clonal pancreatic  $\beta$ -cell lines (MIN6-K) useful for study of incretin/cyclic adenosine monophosphate signaling', *Journal of Diabetes Investigation*. Wiley-Blackwell, 1(4), pp. 137–142. doi: 10.1111/j.2040-1124.2010.00026.x.
- Jain, S. *et al.* (2016) 'ATPase-Modulated Stress Granules Contain a Diverse Proteome and Substructure', *Cell*, 164(3), pp. 487–498. doi: 10.1016/j.cell.2015.12.038.
- Kanai, Y., Dohmae, N. and Hirokawa, N. (2004) 'Kinesin transports RNA: Isolation and characterization of an RNA-transporting granule', *Neuron*. Neuron, 43(4), pp. 513–525. doi: 10.1016/j.neuron.2004.07.022.
- Kedersha, N. *et al.* (2002) 'Evidence that ternary complex (eIF2-GTP-tRNA<sup>iMet</sup>)-Deficient preinitiation complexes are core constituents of mammalian stress granules', *Molecular Biology of the Cell*. The American Society for Cell Biology, 13(1), pp. 195–210. doi: 10.1091/mbc.01-05-0221.
- Kilchert, C. *et al.* (2020) 'From parts lists to functional significance—RNA–protein interactions in gene regulation', *WIREs RNA*. Blackwell Publishing Ltd, 11(3). doi: 10.1002/wrna.1582.
- Kim, C. *et al.* (2016) 'RNA-binding protein HuD reduces triglyceride production in pancreatic  $\beta$  cells by enhancing the expression of insulin-induced gene 1', *Biochimica et Biophysica Acta (BBA) - Gene Regulatory Mechanisms*. Elsevier, 1859(4), pp. 675–685. doi: 10.1016/J.BBAGRM.2016.02.017.
- Kim, H. J. *et al.* (2013) 'Mutations in prion-like domains in hnRNPA2B1 and hnRNPA1 cause multisystem proteinopathy and ALS.', *Nature*. NIH Public Access, 495(7442), pp. 467–73. doi: 10.1038/nature11922.
- Knight, S. W. and Docherty, K. (1992) 'RNA-protein interactions in the 5' untranslated region of preproinsulin mRNA.', *Journal of molecular endocrinology*, 8(3), pp. 225–34. Available at: <http://www.ncbi.nlm.nih.gov/pubmed/1632895> (Accessed: 10 January 2019).
- Knoch, K. P. *et al.* (2004) 'Polypyrimidine tract-binding protein promotes insulin secretory granule biogenesis', *Nature Cell Biology*, 6(3), pp. 207–214. doi: 10.1038/ncb1099.



- Knoch, K. P. *et al.* (2006) 'cAMP-dependent phosphorylation of PTB1 promotes the expression of insulin secretory granule proteins in  $\beta$  cells', *Cell Metabolism*, 3(2), pp. 123–134. doi: 10.1016/j.cmet.2005.12.008.
- Knoch, K. P. *et al.* (2014) 'PTBP1 is required for glucose-stimulated cap-independent translation of insulin granule proteins and Cocksackieviruses in beta cells', *Molecular Metabolism*. Elsevier GmbH, 3(5), pp. 518–530. doi: 10.1016/j.molmet.2014.05.002.
- Kulkarni, S. D. *et al.* (2011) 'Glucose-stimulated translation regulation of insulin by the 5' UTR-binding proteins.', *The Journal of biological chemistry*. American Society for Biochemistry and Molecular Biology, 286(16), pp. 14146–56. doi: 10.1074/jbc.M110.190553.
- Leclerc, I. *et al.* (2004) 'Metformin, but not leptin, regulates AMP-activated protein kinase in pancreatic islets: Impact on glucose-stimulated insulin secretion', *American Journal of Physiology - Endocrinology and Metabolism*. American Physiological Society, 286(6 49-6). doi: 10.1152/ajpendo.00532.2003.
- Lee, E. K. *et al.* (2012) 'RNA-Binding Protein HuD Controls Insulin Translation', *Molecular Cell*. Cell Press, 45(6), pp. 826–835. doi: 10.1016/J.MOLCEL.2012.01.016.
- Lemaire, K., Chimienti, F. and Schuit, F. (2012) 'Zinc transporters and their role in the pancreatic  $\beta$ -cell', *Journal of Diabetes Investigation*, 3(3), pp. 202–211. doi: 10.1111/j.2040-1124.2012.00199.x.
- Li, Z. *et al.* (2018) 'RNA-binding protein DDX1 is responsible for fatty acid-mediated repression of insulin translation.', *Nucleic acids research*. Oxford University Press, 46(22), pp. 12052–12066. doi: 10.1093/nar/gky867.
- Liu, Y. and Shi, S. L. (2021) 'The roles of hnRNP A2/B1 in RNA biology and disease', *Wiley Interdisciplinary Reviews: RNA*. Blackwell Publishing Ltd. doi: 10.1002/wrna.1612.
- Low, Y. H. *et al.* (2021) 'Heterogeneous Nuclear Ribonucleoproteins: Implications in Neurological Diseases', *Molecular Neurobiology*. Springer, pp. 631–646. doi: 10.1007/s12035-020-02137-4.
- Magro, M. G. and Solimena, M. (2013) 'Regulation of  $\beta$ -cell function by RNA-binding proteins', *Molecular Metabolism*. Elsevier, pp. 348–355. doi: 10.1016/j.molmet.2013.09.003.
- Mandrioli, J. *et al.* (2019) 'ALS and FTD: Where RNA metabolism meets protein quality control', *Seminars in Cell and Developmental Biology*. Elsevier Ltd. doi: 10.1016/j.semcdb.2019.06.003.
- Martinez, F. J. *et al.* (2016) 'Protein-RNA Networks Regulated by Normal and ALS-Associated Mutant HNRNPA2B1 in the Nervous System.', *Neuron*. NIH Public Access, 92(4), pp. 780–795. doi: 10.1016/j.neuron.2016.09.050.
- Mehran, A. E. *et al.* (2012) 'Hyperinsulinemia drives diet-induced obesity independently of brain insulin production', *Cell Metabolism*. Cell Metab, 16(6), pp. 723–737. doi: 10.1016/j.cmet.2012.10.019.
- Molinet, M. *et al.* (2000) 'Trafficking/sorting and granule biogenesis in the  $\beta$ -cell', *Seminars in Cell & Developmental Biology*. Academic Press, 11(4), pp. 243–251. doi: 10.1006/SCDB.2000.0173.
- Munro, T. P. *et al.* (1999) 'Mutational analysis of a heterogeneous nuclear ribonucleoprotein A2 response element for RNA trafficking.', *The Journal of biological chemistry*. American Society for Biochemistry and Molecular Biology, 274(48), pp. 34389–95. doi: 10.1074/JBC.274.48.34389.
- Muralidharan, B. *et al.* (2007) 'A minimal element in 5'UTR of insulin mRNA mediates its translational regulation by glucose', *FEBS Letters*, 581(21), pp. 4103–4108. doi: 10.1016/j.febslet.2007.07.050.
- Panas, M. D., Ivanov, P. and Anderson, P. (2016) 'Mechanistic insights into mammalian stress granule dynamics', *Journal of Cell Biology*. Rockefeller University Press, pp. 313–323. doi: 10.1083/jcb.201609081.
- Patel, A. *et al.* (2015) 'A Liquid-to-Solid Phase Transition of the ALS Protein FUS Accelerated by Disease Mutation', *Cell*. Cell Press, 162(5), pp. 1066–1077. doi: 10.1016/j.cell.2015.07.047.
- Pepin, É. *et al.* (2016) 'Pancreatic  $\beta$ -cell dysfunction in diet-induced obese mice: Roles of amp-kinase, protein kinase C $\epsilon$ , mitochondrial and cholesterol metabolism, and alterations in gene expression', *PLoS ONE*. Public Library of Science, 11(4), p. 153017. doi: 10.1371/journal.pone.0153017.
- Phelps, E. A. *et al.* (2017) 'Advances in pancreatic islet monolayer culture on glass surfaces enable super-resolution microscopy and insights into beta cell ciliogenesis and proliferation', *Scientific*

- Reports*. Nature Publishing Group, 7. doi: 10.1038/srep45961.
- Schuit, F. C., Kiekens, R. and Pipeleers, D. G. (1991) 'Measuring the balance between insulin synthesis and insulin release', *Biochemical and Biophysical Research Communications*, 178(3), pp. 1182–1187. doi: 10.1016/0006-291X(91)91017-7.
- Singh, G. *et al.* (2015) 'The Clothes Make the mRNA: Past and Present Trends in mRNP Fashion.', *Annual review of biochemistry*. NIH Public Access, 84, pp. 325–54. doi: 10.1146/annurev-biochem-080111-092106.
- Skelly, R. H. *et al.* (1998) 'A distinct difference in the metabolic stimulus-response coupling pathways for regulating proinsulin biosynthesis and insulin secretion that lies at the level of a requirement for fatty acyl moieties.', *The Biochemical journal*. Portland Press Ltd, 331 ( Pt 2)(Pt 2), pp. 553–61. Available at: <http://www.ncbi.nlm.nih.gov/pubmed/9531497> (Accessed: 10 January 2019).
- Smith, R. (2004) 'Moving molecules: mRNA trafficking in mammalian oligodendrocytes and neurons', *Neuroscientist*, pp. 495–500. doi: 10.1177/1073858404266759.
- Solimena, M. *et al.* (2018) 'Systems biology of the IMIDIA biobank from organ donors and pancreatectomised patients defines a novel transcriptomic signature of islets from individuals with type 2 diabetes', *Diabetologia*, 61(3), pp. 641–657. doi: 10.1007/s00125-017-4500-3.
- Sonenberg, N. and Hinnebusch, A. G. (2009) 'Regulation of Translation Initiation in Eukaryotes: Mechanisms and Biological Targets', *Cell*. Elsevier B.V., pp. 731–745. doi: 10.1016/j.cell.2009.01.042.
- Süss, C. *et al.* (2009) 'Rapid changes of mRNA-binding protein levels following glucose and 3-isobutyl-1-methylxanthine stimulation of insulinoma INS-1 cells.', *Molecular & cellular proteomics: MCP*. American Society for Biochemistry and Molecular Biology, 8(3), pp. 393–408. doi: 10.1074/mcp.M800157-MCP200.
- Szkudelski, T. and Szkudelska, K. (2019) 'The relevance of AMP-activated protein kinase in insulin-secreting  $\beta$  cells: a potential target for improving  $\beta$  cell function?', *Journal of Physiology and Biochemistry*. Springer, pp. 423–432. doi: 10.1007/s13105-019-00706-3.
- Tauber, D., Tauber, G. and Parker, R. (2020) 'Mechanisms and Regulation of RNA Condensation in RNP Granule Formation', *Trends in Biochemical Sciences*. Elsevier Ltd. doi: 10.1016/j.tibs.2020.05.002.
- Tillmar, L., Carlsson, C. and Welsh, N. (2002) 'Control of insulin mRNA stability in rat pancreatic islets: Regulatory role of a 3'-untranslated region pyrimidine-rich sequence', *Journal of Biological Chemistry*, 277(2), pp. 1099–1106. doi: 10.1074/jbc.M108340200.
- Tsuboi, T. *et al.* (2003) '5-AMP-activated Protein Kinase Controls Insulin-containing Secretory Vesicle Dynamics' □ S'. *JBC Papers in Press*. doi: 10.1074/jbc.M307800200.
- Tyanova, S. *et al.* (2016) 'The Perseus computational platform for comprehensive analysis of (prote)omics data', *Nature Methods*. Nature Publishing Group, pp. 731–740. doi: 10.1038/nmeth.3901.
- Uchizono, Y. *et al.* (2007) 'The balance between proinsulin biosynthesis and insulin secretion: where can imbalance lead?', *Diabetes, Obesity and Metabolism*. John Wiley & Sons, Ltd (10.1111), 9(s2), pp. 56–66. doi: 10.1111/j.1463-1326.2007.00774.x.
- Vasiljević, J. *et al.* (2020) 'The making of insulin in health and disease', *Diabetologia*. Springer, pp. 1981–1989. doi: 10.1007/s00125-020-05192-7.
- Welsh, M. *et al.* (1985) 'Control of insulin gene expression in pancreatic beta-cells and in an insulin-producing cell line, RIN-5F cells. II. Regulation of insulin mRNA stability', 260(25), pp. 13590–13594. Available at: <http://www.ncbi.nlm.nih.gov/pubmed/3902821>.
- Wentworth, B. M. *et al.* (1992) 'The ratio of mouse insulin I:insulin II does not reflect that of the corresponding preproinsulin mRNAs', *Molecular and Cellular Endocrinology*. Elsevier, 86(3), pp. 177–186. doi: 10.1016/0303-7207(92)90142-S.
- Wicksteed, B. *et al.* (2001) 'Cooperativity between the Preproinsulin mRNA Untranslated Regions Is Necessary for Glucose-stimulated Translation', *Journal of Biological Chemistry*, 276(25), pp. 22553–22558. doi: 10.1074/jbc.M011214200.

- Wicksteed, B. *et al.* (2007) 'A cis-Element in the 5' Untranslated Region of the Preproinsulin mRNA (pplGE) Is Required for Glucose Regulation of Proinsulin Translation', *Cell Metabolism*, 5(3), pp. 221–227. doi: 10.1016/j.cmet.2007.02.007.
- Wigger, L. *et al.* (2020) 'Multi-omics profiling of living human pancreatic islet donors reveals heterogeneous beta cell trajectories toward type 2 diabetes', *bioRxiv*. doi: <https://doi.org/10.1101/2020.12.05.412338>
- Xie, F. *et al.* (2012) 'miRDeepFinder: A miRNA analysis tool for deep sequencing of plant small RNAs', *Plant Molecular Biology*. *Plant Mol Biol*, 80(1), pp. 75–84. doi: 10.1007/s11103-012-9885-2.
- Xue, Y. C. *et al.* (2020) 'Dysregulation of RNA-Binding Proteins in Amyotrophic Lateral Sclerosis', *Frontiers in Molecular Neuroscience*. *Frontiers Media S.A.* doi: 10.3389/fnmol.2020.00078.
- Youn, J. Y. *et al.* (2019) 'Properties of Stress Granule and P-Body Proteomes', *Molecular Cell*. *Cell Press*, pp. 286–294. doi: 10.1016/j.molcel.2019.09.014.



## Figure and table legends

**Figure 1. A specific set of RBPs bind to 5'-UTRs of mRNAs encoding secretory granule proteins in resting and in stimulated MIN6 cells.** **A:** cartoon of *in vitro* RNA pull-down. **B:** PCA plot of the MS results from RNA pull-downs with secretory granule protein mRNA 5'-UTRs from cytosolic extracts of resting (R, open squares) and stimulated (S, filled squares) MIN6 cells. The  $\gamma$ -tub 5'-UTR was as a control. **C and D:** volcano plots showing significantly enriched proteins binding to the *Ins1* 5'-UTR compared to the  $\gamma$ -tub 5'-UTR in resting (orange, **C**) and stimulated (blue, **D**) MIN6 cells. See also Suppl. Figure 1B and C. **E and F:** interaction plots of all significantly enriched RBPs that bind to the secretory granule protein mRNA 5'-UTRs in resting (orange, **E**) and stimulated (blue, **F**) MIN6 cells. Proteins that were shared among all transcripts are labeled with a darker color. Ins – insulin; Pc2 – prohormone convertase 2; Ica512 – islet cell autoantigen 512;  $\gamma$ -tub –  $\gamma$ -tubulin; R – resting, 2 h, 0 mM glucose; S – stimulated, 25 mM glucose, 2h.

**Figure 2. hnRNP A2/B1 binds to the 5'-UTRs of secretory granule protein transcripts.** **A:** quantification of UV-crosslinked transcripts co-purified by hnRNP A2/B1 immunoprecipitation (IP). Fold enrichment was calculated compared to a nonspecific IgG IP (n=3, mean $\pm$ SD). Panel on the right shows a representative image demonstrating the specificity of the antibody. **B:** sequence and location of putative A2REs in the 5'-UTRs of mouse secretory granule protein transcripts, and human and rat insulin transcripts. The core A2RE11 is labeled in purple and the longer A2RE21 is labeled in green, nucleotides differing to the consensus sequence are labeled in red. **C:** RNA pull-down with the WT and A2RE-mutated *Ins1* 5'-UTR from cytosolic MIN6 cell extracts. Mutated nucleotides are shown below in red. Ins – insulin; Pc – prohormone convertase; Ica512 – islet cell autoantigen 512;  $\gamma$ -tub –  $\gamma$ -tubulin; A2RE – A2 response element.

**Figure 3. hnRNP A2/B1 KO reduces insulin expression in MIN6 cells.** **A:** qPCR of *Ins1* and *Ins2* RNA in resting and stimulated WT and *Hnnpa2b1* KO MIN6 cells. **B:** Immunoblot and quantification of hnRNP A2/B1 and insulin in resting and stimulated WT and *Hnnpa2b1* KO MIN6 cells,  $\gamma$ -tubulin was used as a loading control. **C:** ELISA of proinsulin and insulin from cell lysates (intracellular) and media (secreted insulin) of resting and stimulated WT and *Hnnpa2b1* KO MIN6 cells, normalized to DNA concentration. Stimulation index is calculated as secreted insulin divided by total insulin and normalized to resting insulin levels. Ins – insulin; R – resting, 2 h, 0 mM glucose; S – stimulated, 25 mM glucose, 2h. Plots show Tukey-style

boxplots of five independent replicates. Mann-Whitney test: \* =  $p < 0.05$ , \*\* =  $p < 0.01$ , \*\*\* =  $p < 0.005$ .

**Figure 4. hnRNP A2/B1 controls insulin biosynthesis MIN6 cells.** **A:** Nanoluciferase activity of WT and mutated A2REs within the *Ins1* mRNA 5'-UTR, normalized to firefly luciferase. Mutations as in fig. 2C. Plots show Tukey-style boxplots of three independent replicates. Mann-Whitney test: \* =  $p < 0.05$ , \*\* =  $p < 0.01$ . Ins – insulin;  $\gamma$ -tub –  $\gamma$ -tubulin; A2RE – A2 response element.

**Figure 5. The insulin mRNA colocalizes with stress granules in resting MIN6 K8 cells.** **A:** Resting and stimulated MIN6 K8 cells were stained against G3BP1, hnRNP A2/B1, and the *Ins1* mRNA. Nuclei were counterstained with DAPI, maximum intensity projections are shown. Scale bar = 10  $\mu$ m. Pearson's correlation coefficient of five independent experiments represented as Tukey-style boxplots; t-test: \*\*\*\* =  $p < 0.001$ . R – resting, 2 h, 0 mM glucose; S – stimulated, 25 mM glucose, 2h. Ins1 – insulin1.

**Figure 6. hnRNP A2/B1 and *insulin* mRNA-positive stress granules in primary beta cells.** **A:** Dispersed C57BL/6 Black six mice incubated for 2h at 0 mM, 3.3 mM or 16.7 mM glucose and stained for G3BP1, hnRNP A2/B1 and *Ins1* mRNA. **B:** FFPE pancreatic section from partially pancreatectomized ND and T2D patients stained with hnRNP A2/B1 and insulin as beta cell maker. Arrows point to cytoplasmic hnRNP A2/B1-positive RNA granules, islets are circled with yellow lines. **C:** FFPE pancreatic sections from partially pancreatectomized ND and T2D patients stained with the *INS* mRNA. Arrows point to *INS* mRNA-positive RNA granules. Scale bar = 10  $\mu$ m. ND – non-diabetic; T2D – type 2 diabetic; FFPE – formalin fixed paraffin embedded.

**Table 1. Clinical parameters of living pancreas donors.** BMI - body mass index; M - male; F- female; ND - non-diabetic, T2D - type 2 diabetic; hba1c - glycated haemoglobin.

**Figure 1**

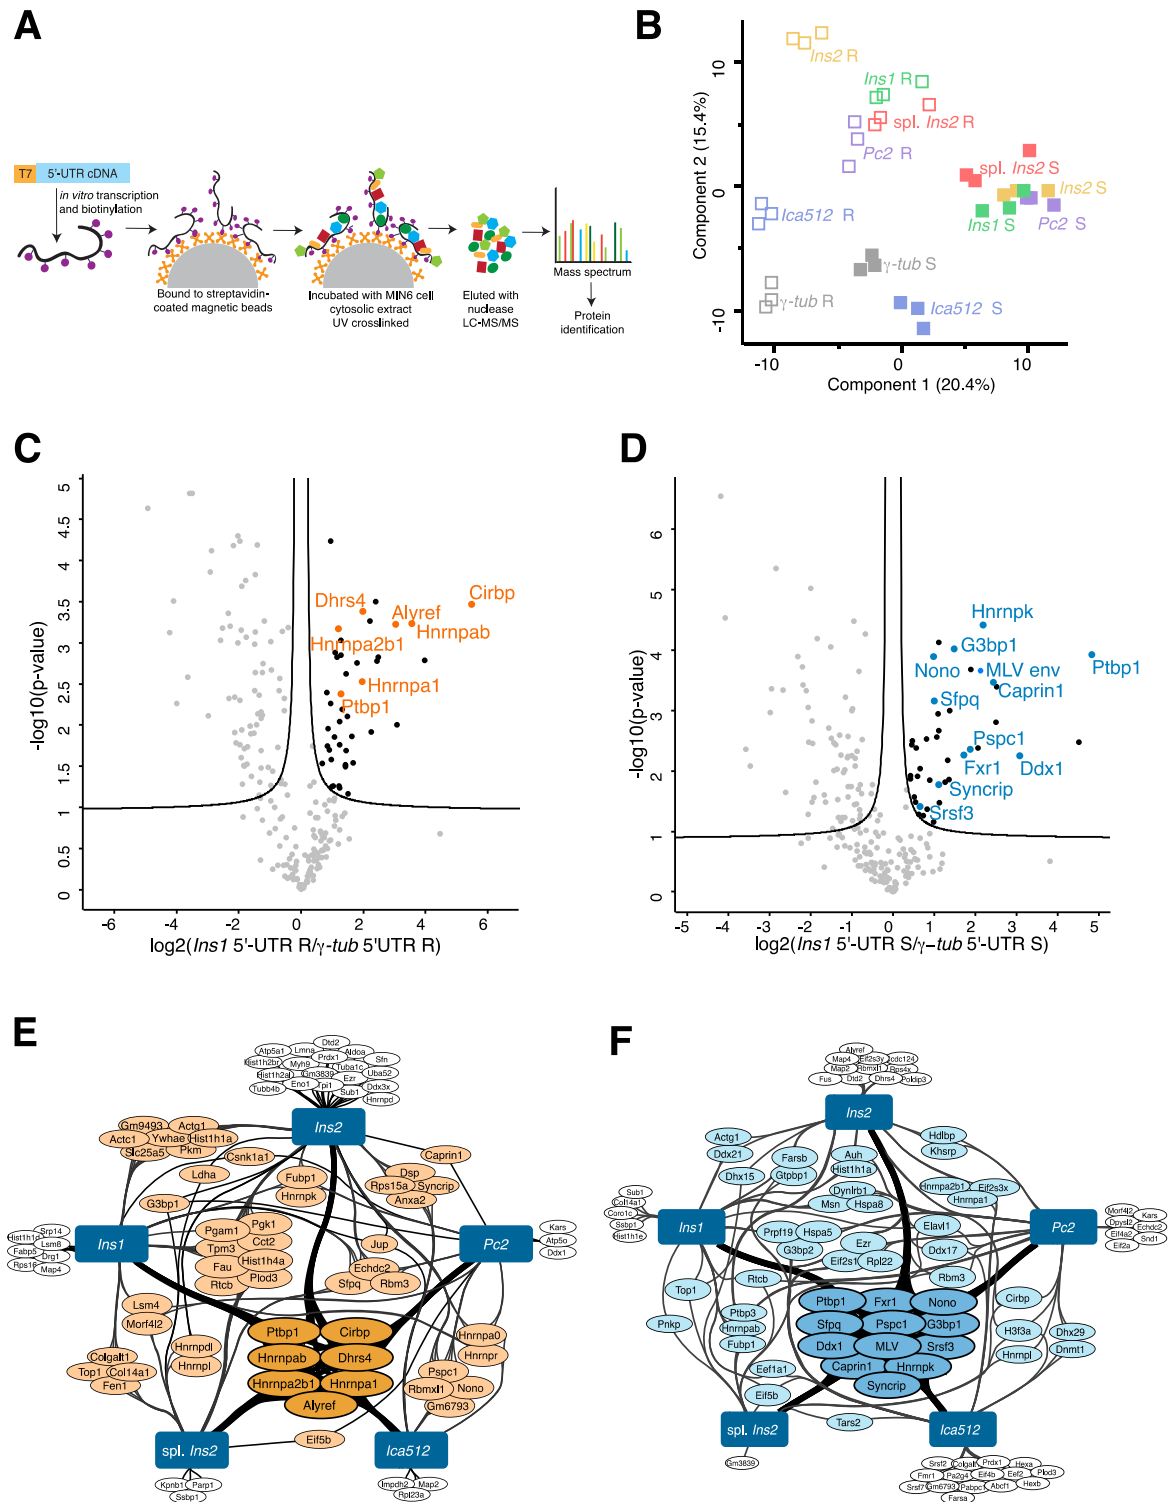

**Figure 2**

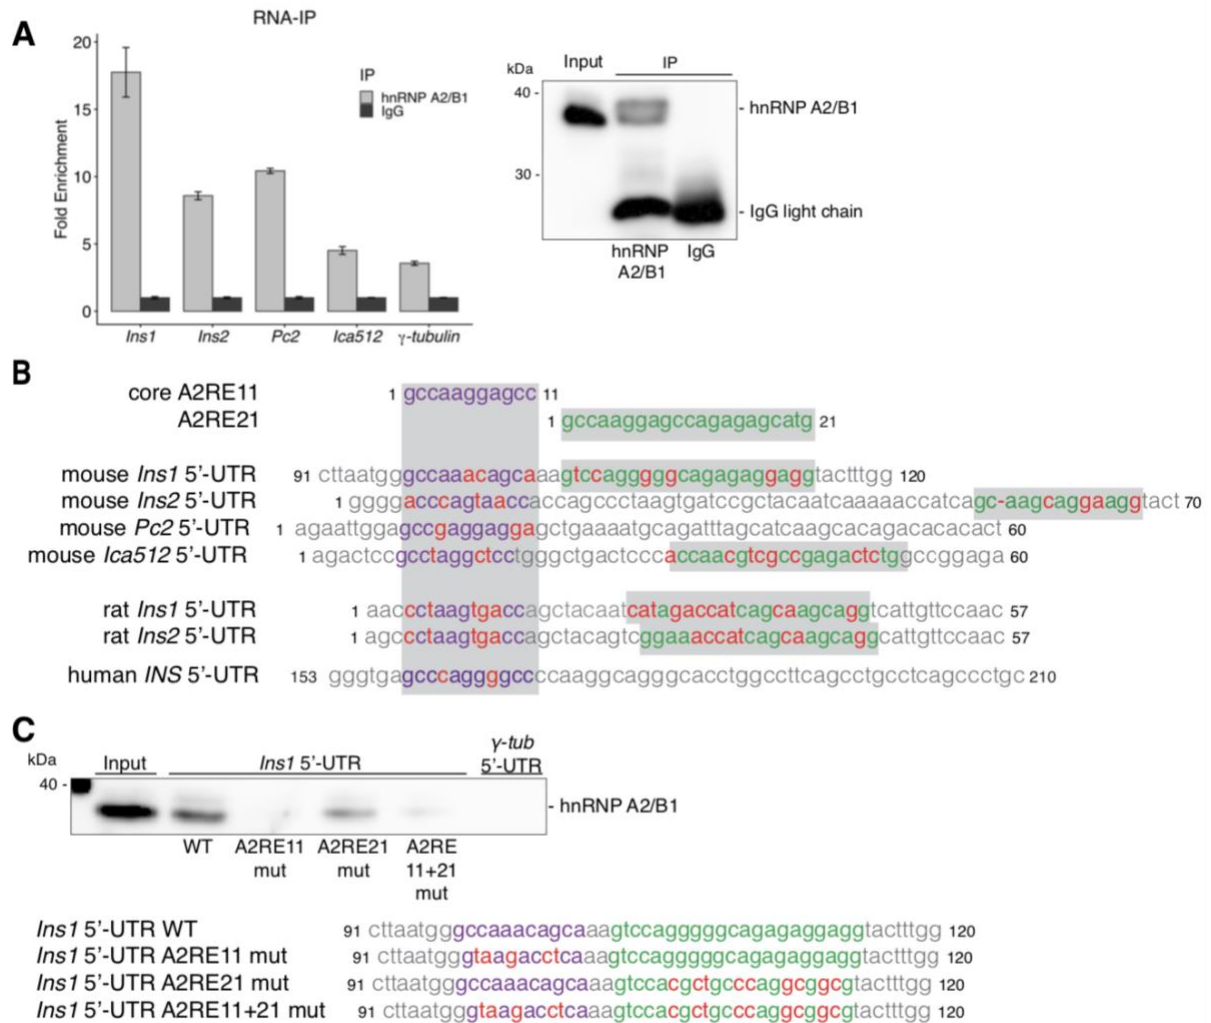

**Figure 3**

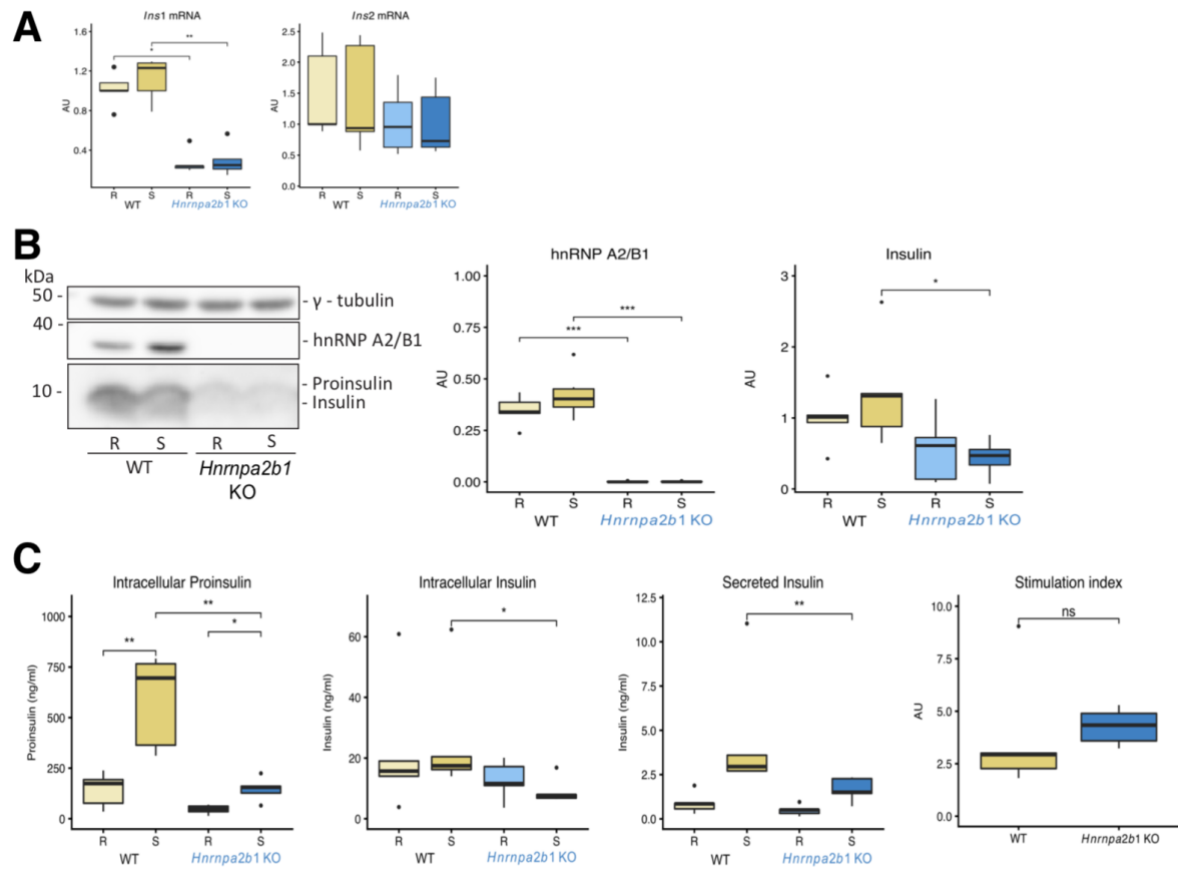

**Figure 4**

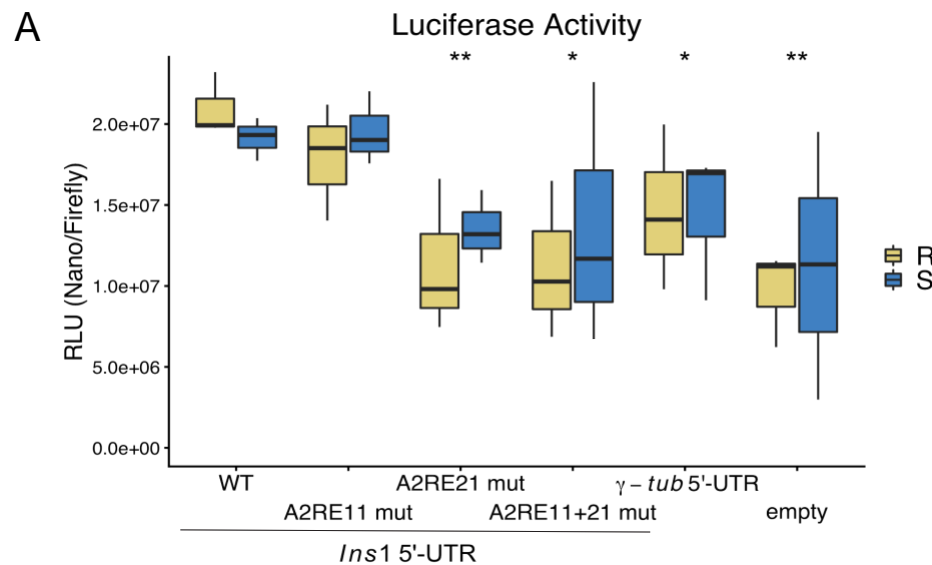

**Figure 5**

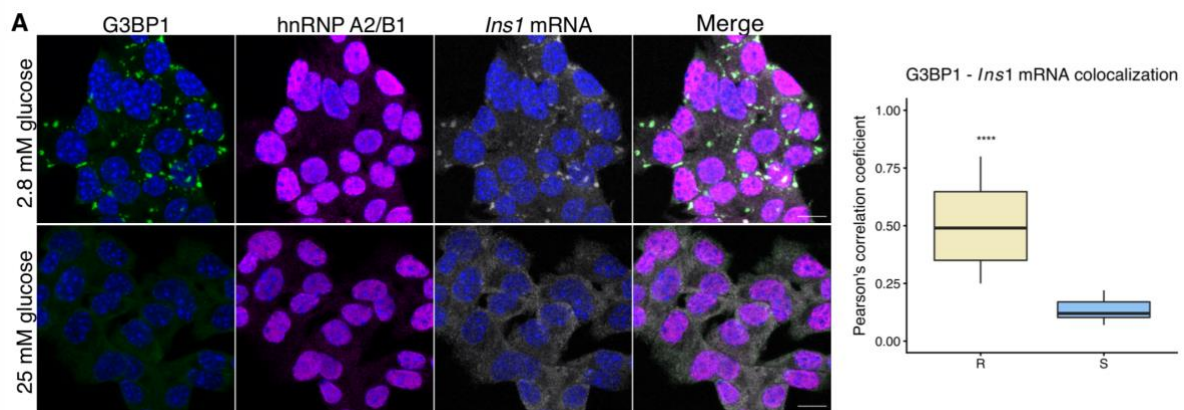



**Figure 6**

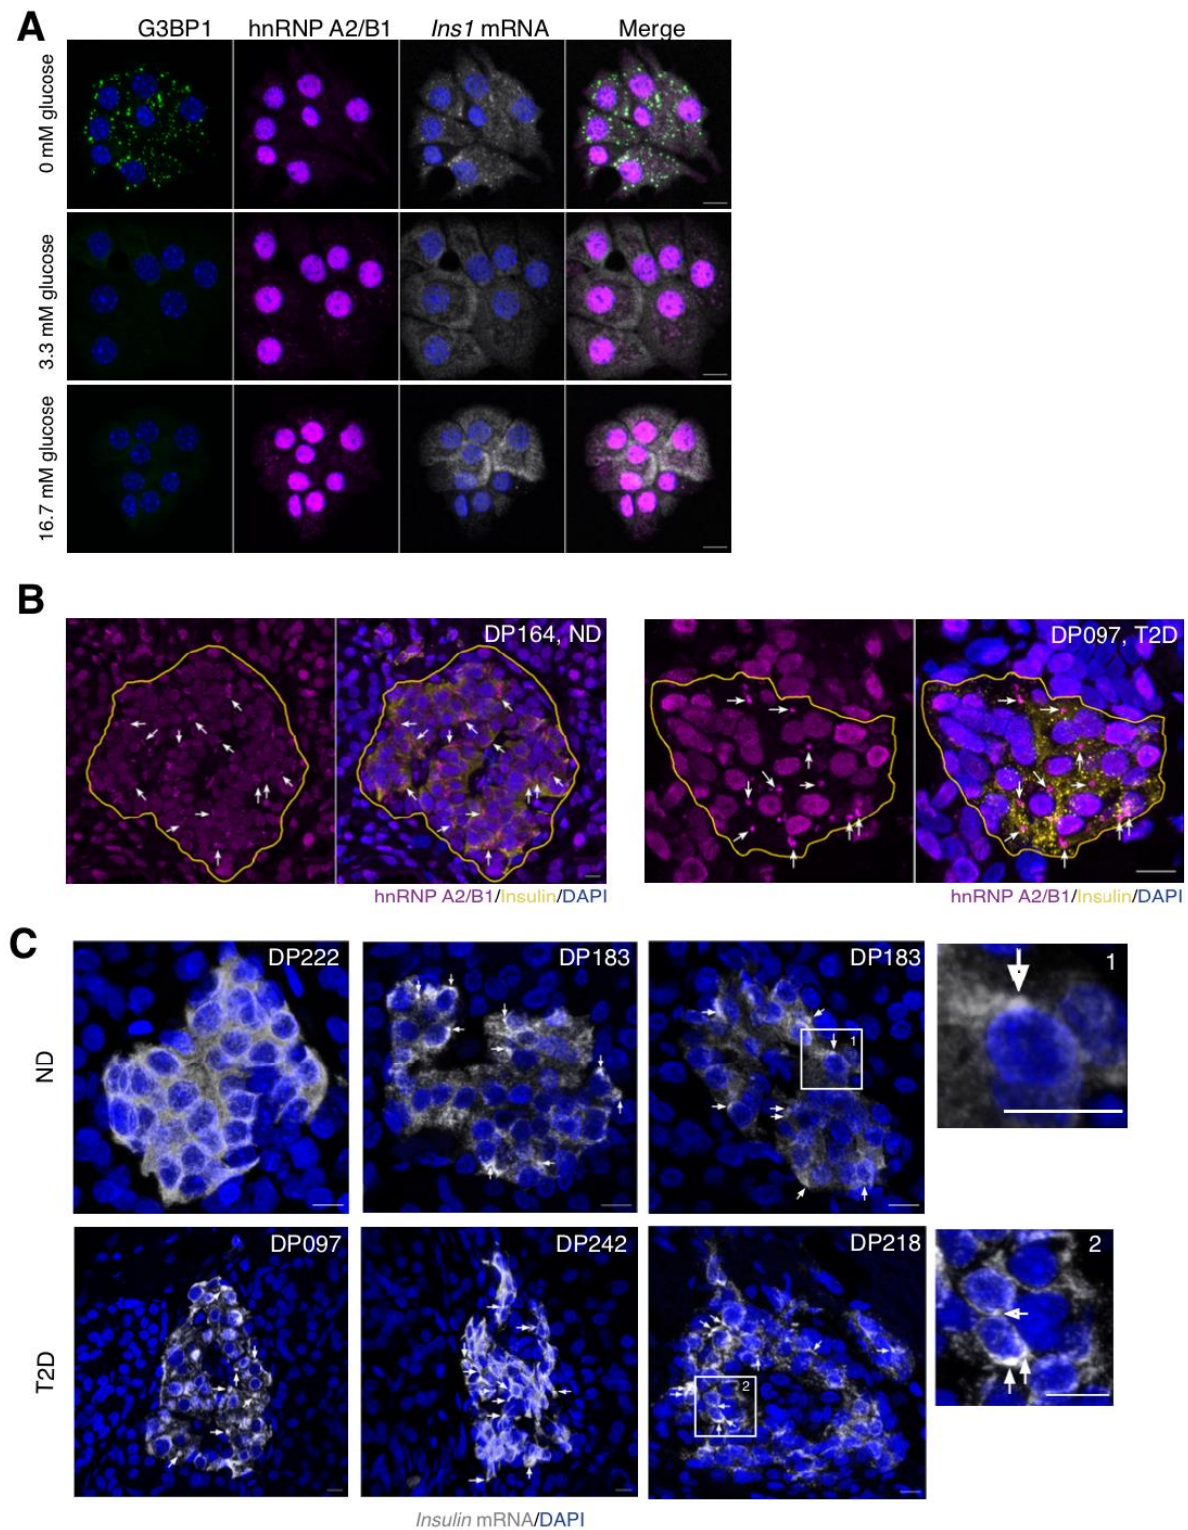

**Table 1.**

| <b>patient id<br/>[DP-Nr]</b> | <b>diabetes status</b> | <b>gender</b> | <b>age</b> | <b>BMI</b> | <b>hba1c</b> |
|-------------------------------|------------------------|---------------|------------|------------|--------------|
| DP159                         | ND                     | M             | 52         | 26.800     | 4.8          |
| DP164                         | ND                     | F             | 86         | 30.400     | 5.0          |
| DP173                         | ND                     | F             | 61         | 19.433     | 5.3          |
| DP183                         | ND                     | M             | 60         | 23.306     | 4.9          |
| DP222                         | ND                     | F             | 65         | 26.028     | 5.2          |
| DP097                         | T2D                    | M             | 30         | 25.978     | 7.7          |
| DP099                         | T2D                    | F             | 66         | 29.706     | 8.4          |
| DP166                         | T2D                    | F             | 76         | 37.924     | 7.1          |
| DP201                         | T2D                    | M             | 70         | 26.827     | 6.4          |
| DP218                         | T2D                    | F             | 76         | 28.889     | 6.1          |
| DP242                         | T2D                    | M             | 74         | 25.300     | 8.1          |

## Supplementary figure and table legends

**Supplementary figure S1. *In vitro* RNA pull-down with the 5'-UTRs of secretory granule protein transcripts.** Relates to figure 1. **A:** validation of non-specific  $\gamma$ -tub 5'-UTR control for the identification of secretory granule protein RNPs. **B:** PCA plot of two independent experiments in resting (R, open squares) and stimulated (S, filled squares) MIN6 cells. **C and D:** volcano plots showing significantly enriched proteins binding to the 5'UTRs of *Ins2*, spliced *Ins2*, *Pc2* and *Ica512* 5'-UTRs compared to the  $\gamma$ -tub 5'-UTR in resting (orange, **C**) and stimulated (blue, **D**) MIN6 cells. Ins – insulin; Pc2 – prohormone convertase 2; Ica512 – islet cell autoantigen 512;  $\gamma$ -tub –  $\gamma$ -tubulin; R – resting, 2 h, 0 mM glucose; S – stimulated, 25 mM glucose, 2h.

**Suppl. figure S2. Generation of *Hnrnpa2b1* KO MIN6 cell line.** Relates to figure 3 and supplementary figure S3. **A:** genomic sequence of the mouse *Hnrnpa2b1* gene. Boxed region defines the guide sequence and arrows show the cut site. **B:** validation of *Hnrnpa2b1* KO MIN6 clone. **C:** sequence comparison between the WT and *Hnrnpa2b1* KO MIN6 cells. Color code as in A.

**Suppl. figure S3. Secretory granule protein expression in *Hnrnpa2b1* KO MIN6 cells.** Relates to figure 3. **A:** qPCR of *Pc2*, *Pc1/3* and *Ica512* RNA in resting and stimulated WT and *Hnrnpa2b1* KO MIN6 cells. **B:** Immunoblot and quantification of PC2, PC1/3, ICA512 and hnRNP A1 in resting and stimulated WT and *Hnrnpa2b1* KO MIN6 cells.  $\gamma$ -tubulin was used as a loading control. Ins – insulin; PC – prohormone convertase; ICA512 – islet cell autoantigen 512; R – resting, 2 h, 0 mM glucose; S – stimulated, 25 mM glucose, 2h. Plots show Tukey-style boxplots with five independent replicates. Mann-Whitney test: \* =  $p < 0.05$ , \*\* =  $p < 0.01$ , \*\*\* =  $p < 0.005$ .

**Suppl. Figure S4. hnRNP A2/B1 localizes to stress granules in resting MIN6 cells.** Relates to figure 5 and suppl. figure 5. **A:** hnRNP A2/B1 staining of resting and stimulated MIN6 cells. **B:** resting MIN6 cells were permeabilized with saponin, treated with RNase A prior to fixation and stained against hnRNP A2/B1. **C, D, E:** resting and stimulated MIN6 cells were co-stained with hnRNP A2/B1 and stress granule markers G3BP1 (**C**) and eIF3b (**D**), and the P body maker Dcp1a (**E**). **F:** resting and stimulated MIN6 cells were co-stained with G3BP1 and eIF3b as positive colocalization control. Nuclei were counterstained with DAPI, maximum intensity projections are shown. Scale bar = 10  $\mu$ m. **G:** Pearson's correlation coefficient of C-

F from three independent experiments represented as Tukey-style boxplots; t-test: \*\*\* =  $p < 0.005$ , \*\* =  $p < 0.01$  R – resting, 2 h, 0 mM glucose; S – stimulated, 25 mM glucose, 2h.

**Suppl. Figure S5. The *Ins1* mRNA colocalizes to hnRNP A2/B1 positive stress granules in MIN6 cells.** Relates to figure 5 and suppl. figure 4. **A:** resting and stimulated MIN6 cells were fixed in PFA and stained against hnRNP A2/B1 and single molecule FISH probes specific to the *Ins1* mRNA. Nuclei were counterstained with DAPI, maximum intensity projections are shown. Scale bar = 10  $\mu$ m. Pearson's correlation coefficient of five independent experiments represented as Tukey-style boxplots; t-test: \*\*\*\* =  $p < 0.001$ . R – resting, 2 h, 0 mM glucose; S – stimulated, 25 mM glucose, 2h.

**Suppl. Figure S6. Characterization of the MIN6 K8 clone.** Relates to figure 5. **A:** secretory granule protein levels in MIN6 and MIN6 K8 cells incubated with 0, 2.8 and 25 mM glucose. **B:** RNA pull-downs with the secretory granule protein 5'-UTRs from cytosolic extracts of resting and stimulated MIN6 K8 cells were blotted for the RBPs of secretory granule protein RNPs. **C:** blot and quantification of AMPK $\alpha$  and eIF2 $\alpha$  phosphorylation in MIN6 and MIN6 K8 cells incubated with 0, 2.8 and 25 mM glucose. Ins – insulin; PC2 – prohormone convertase 2; ICA512 – islet cell autoantigen 512;  $\gamma$ -tub –  $\gamma$ -tubulin; R – resting, 2 h, 2.8 mM glucose; S – stimulated, 25 mM glucose, 2h. Plots show Tukey-style boxplots with five independent replicates. Mann-Whitney test compared to MIN6 at 0 mM glucose: \* =  $p < 0.05$ , \*\* =  $p < 0.01$ .

**Suppl. Figure S7. Stress granule markers in human pancreas sections.** **A:** FFPE pancreatic sections from partially pancreatectomized ND and T2D patients stained with hnRNP A2/B1. Islets are labeled with either insulin or glucagon and circled with yellow lines. Arrows point to cytoplasmic hnRNP A2/B1-positive RNA granules. **B:** FFPE pancreatic sections from partially pancreatectomized ND and T2D patients stained with hnRNP A2/B1, G3BP1 and insulin. Islets are circled with yellow lines. Arrows point to cytoplasmic hnRNP A2/B1-positive RNA granules, arrowheads to G3BP1-positive RNA granules. **C:** FFPE pancreatic sections from partially pancreatectomized ND and T2D patients stained with the *INS* mRNA. Arrows point to *INS* mRNA-positive RNA granules. Scale bar = 10  $\mu$ m. ND – non-diabetic; T2D – type 2 diabetic; FFPE – formalin fixed paraffin embedded.

**Suppl. Table 1. Identified proteins identified by MS from *in vitro* pull-downs with the 5'-UTRs of mouse *Ins1*, *Ins1*, spliced *Ins2*, *Pc2*, *Ica512* and  $\gamma$ -tub mRNAs and from resting (R) and stimulated (S) MIN6 cells.**

**Suppl. Table 2. Significance analysis of identified proteins.** Significant enrichment of identified proteins was analyzed individually for every target 5'-UTR compared to *γ-tub* 5'-UTR in resting (R) and stimulated (S) conditions using permutation-based t-tests in Perseus, with a FDR of 0.05 and slope  $s_0$  of 0.2.

## Supplementary Figure 1

**A**

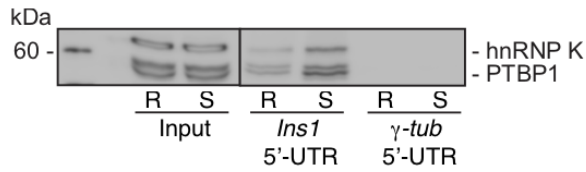

**B**

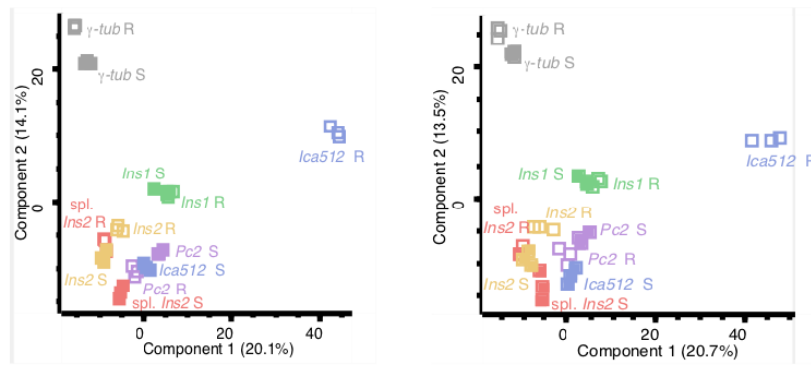

**C**

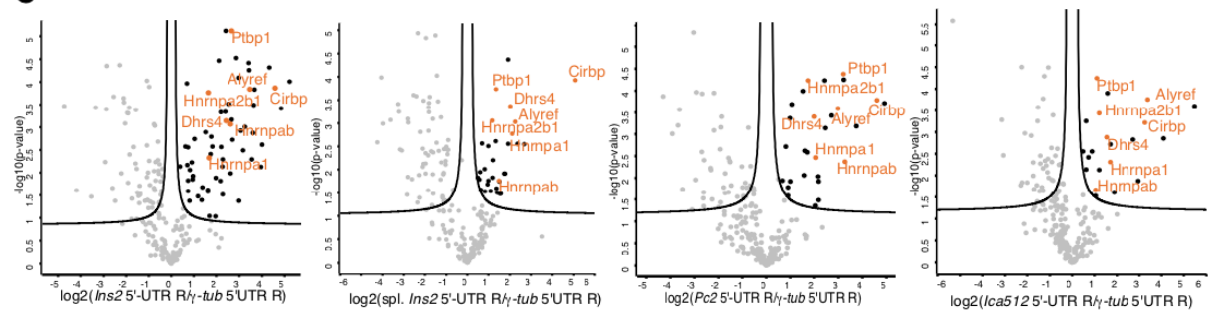

**D**

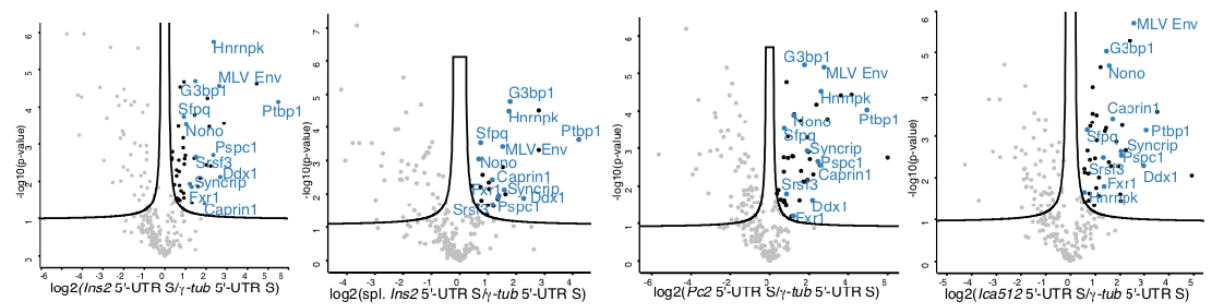



## Supplementary Figure 2

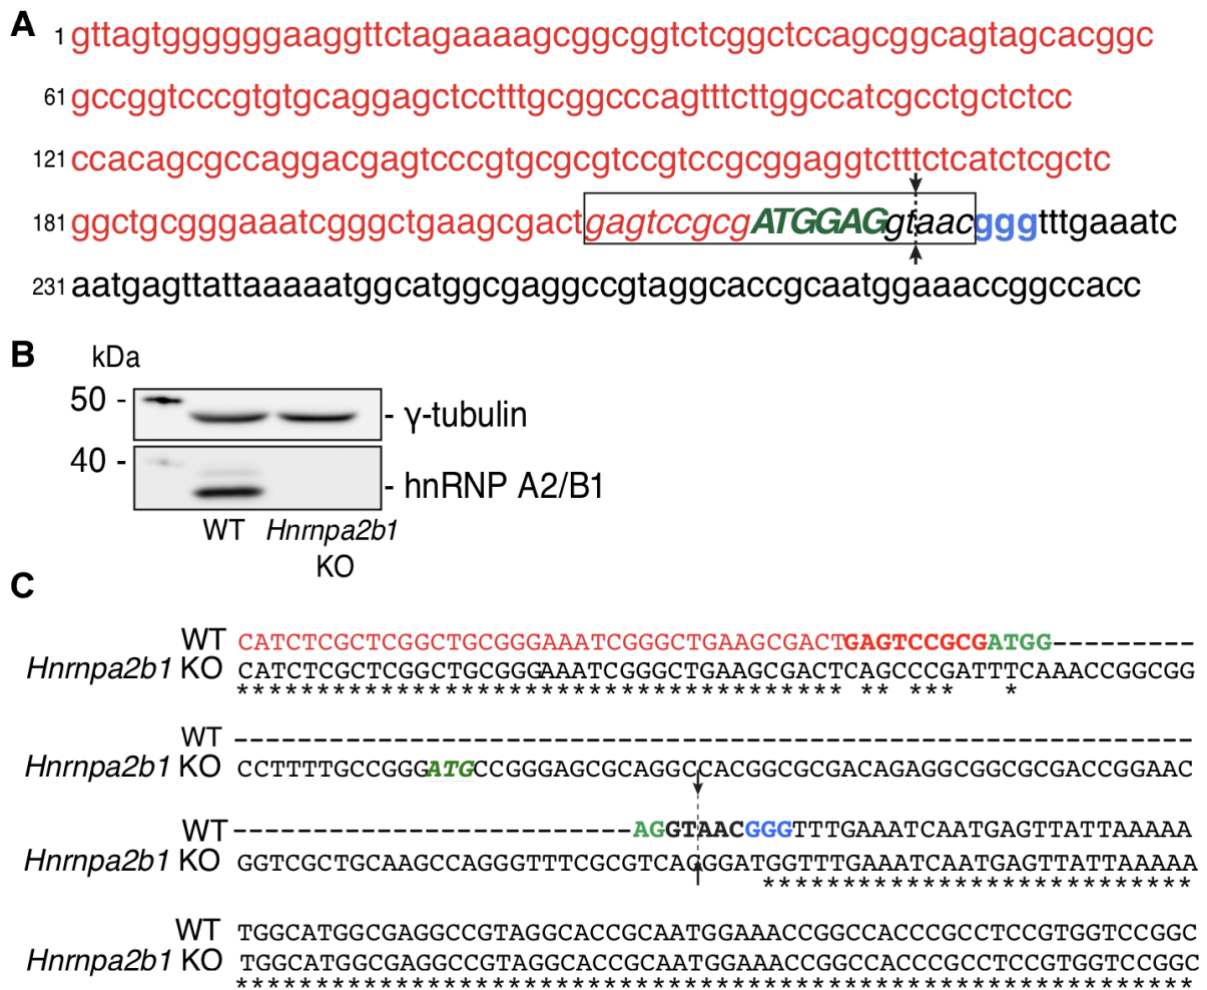

# Supplementary Figure 3

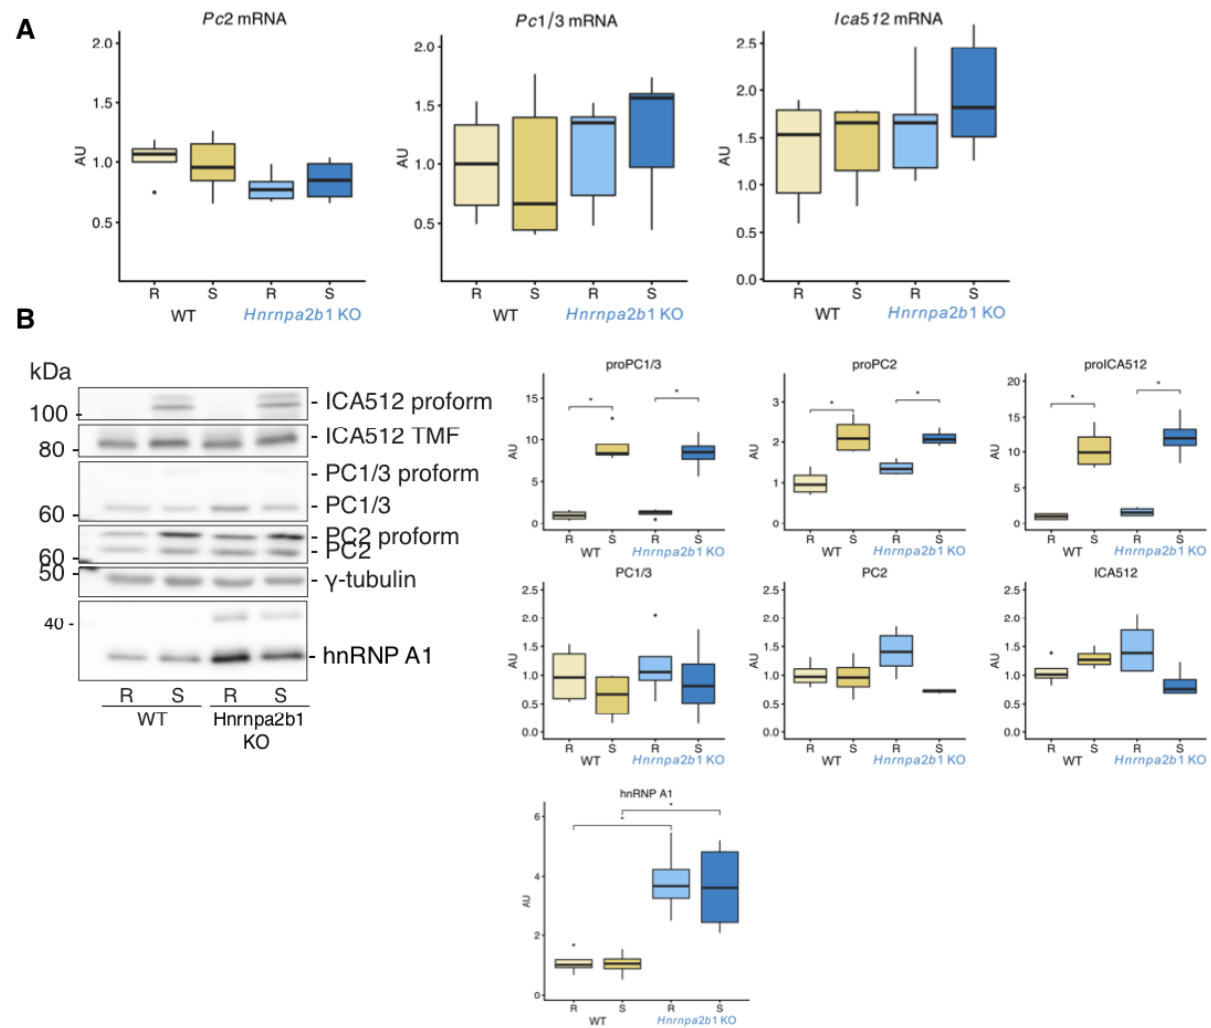

# Supplementary Figure 4

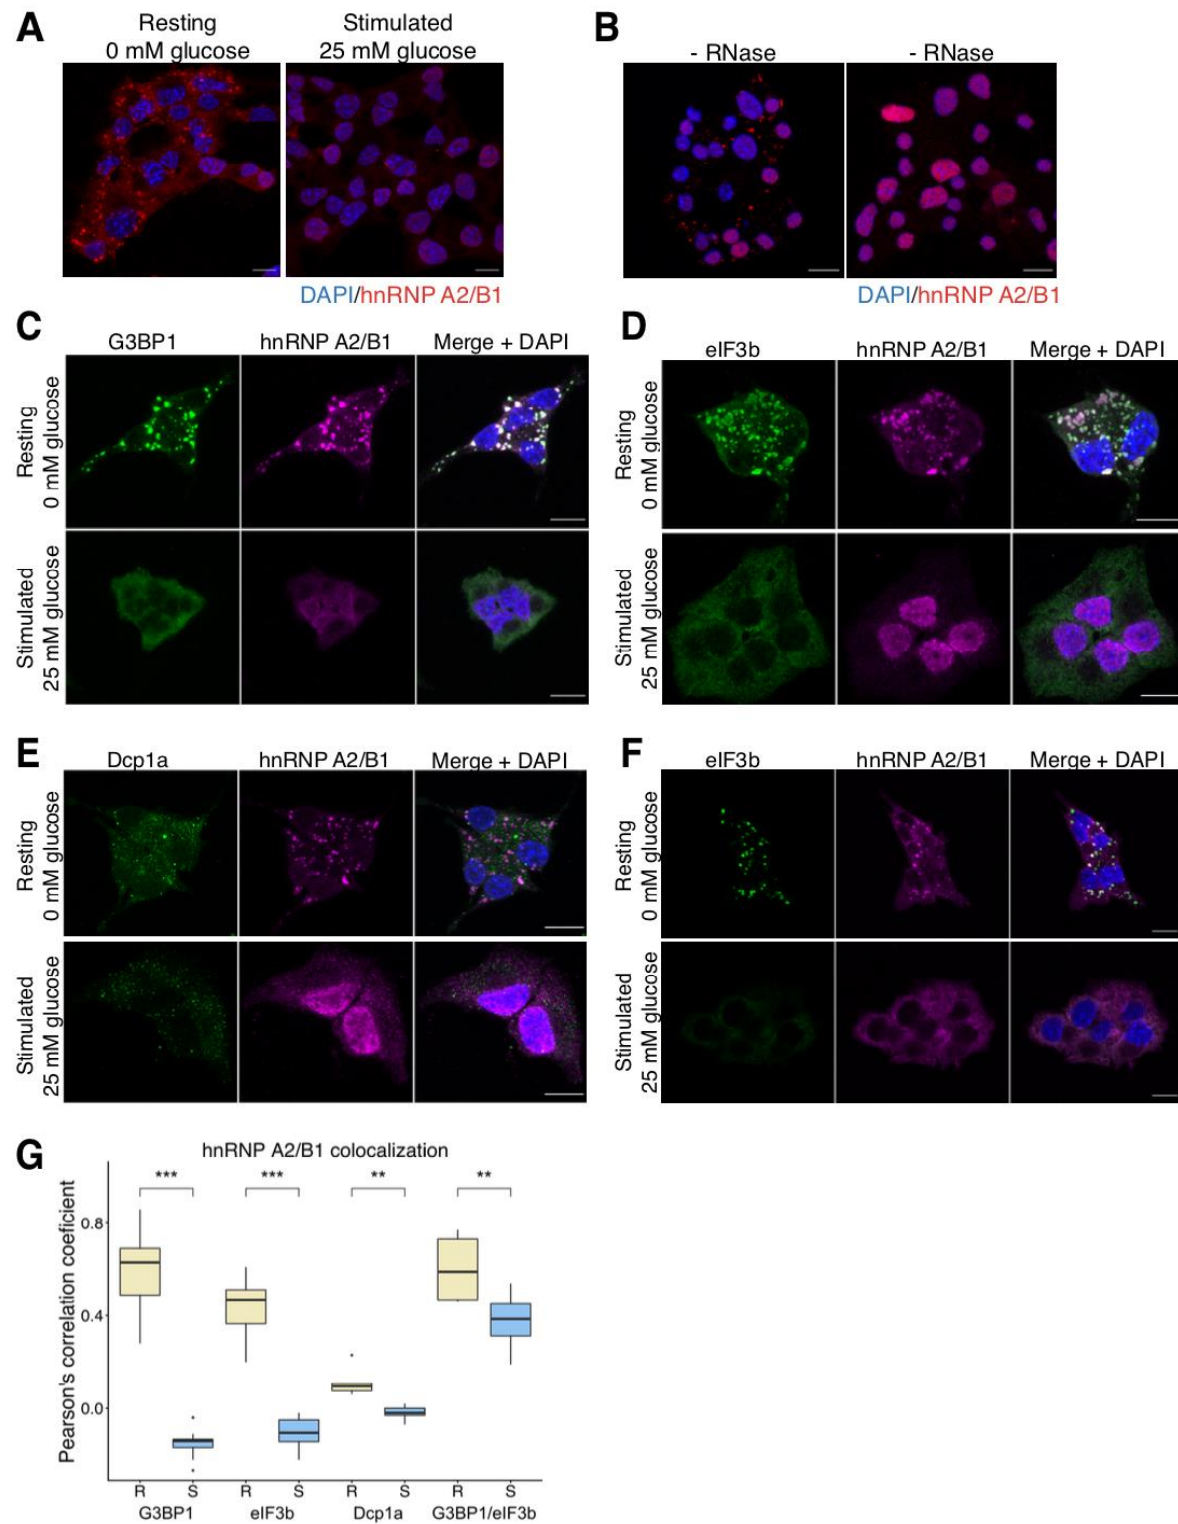

## Supplementary Figure 5

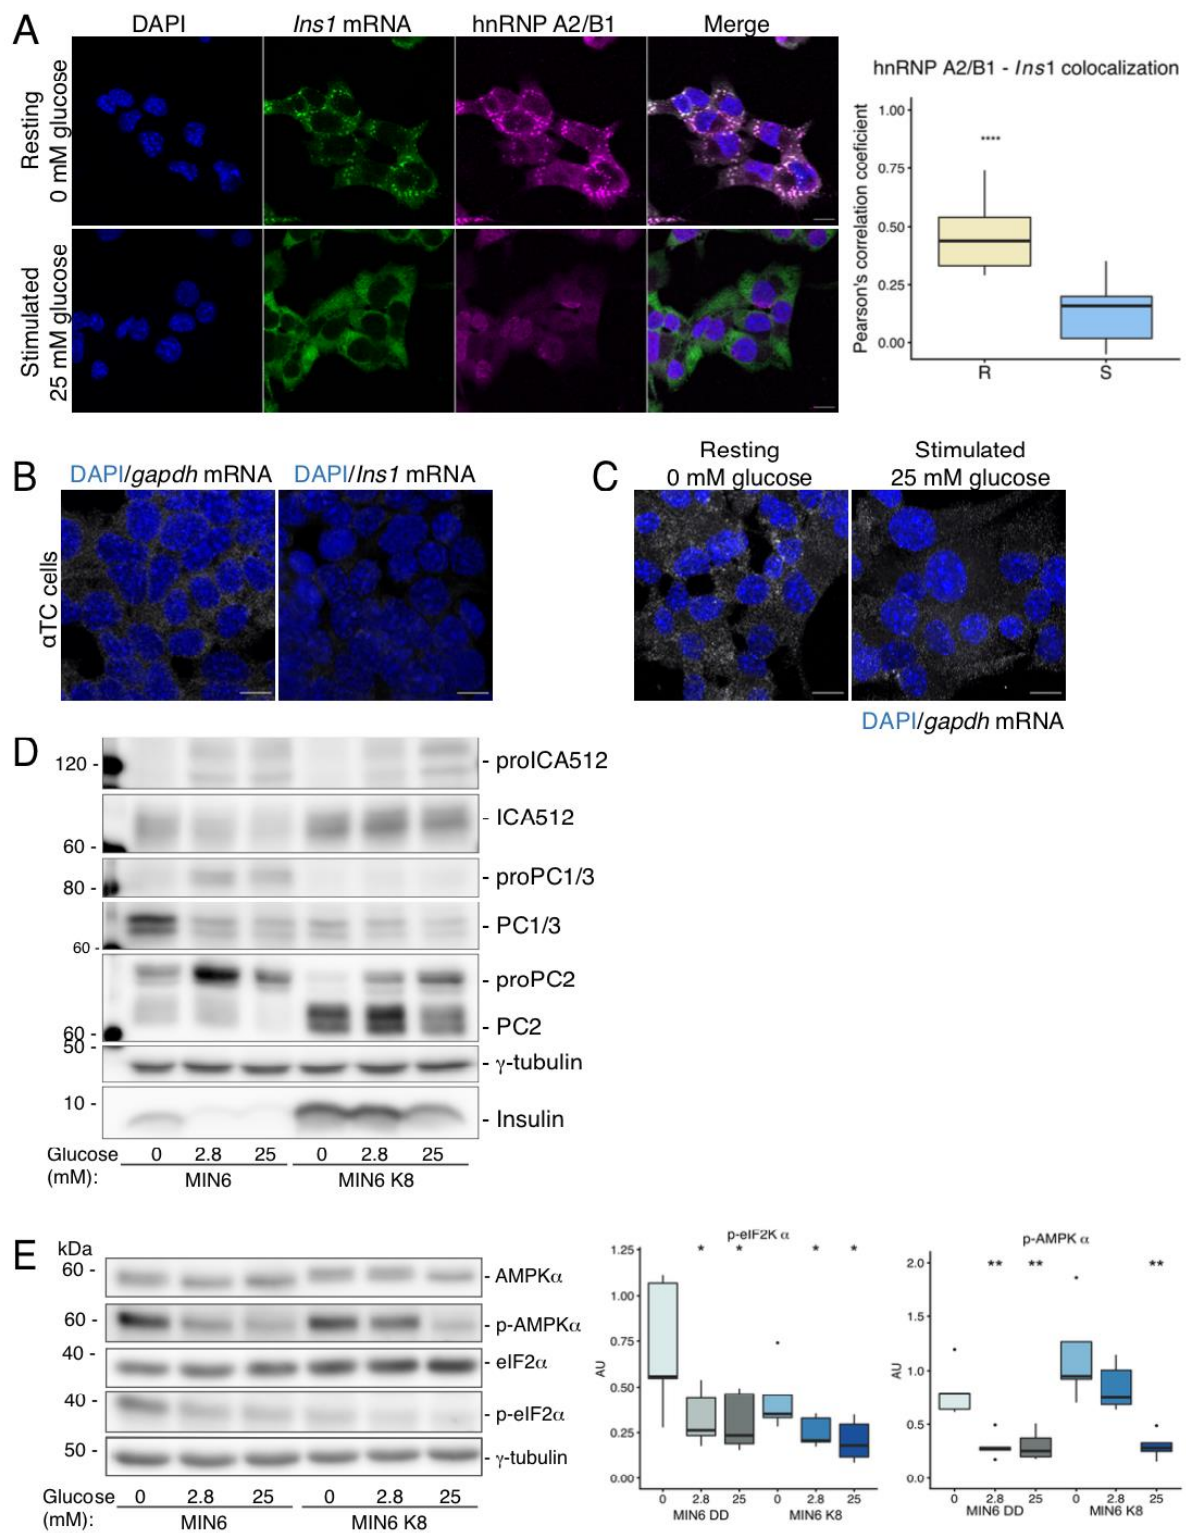





## Supplementary Figure 7

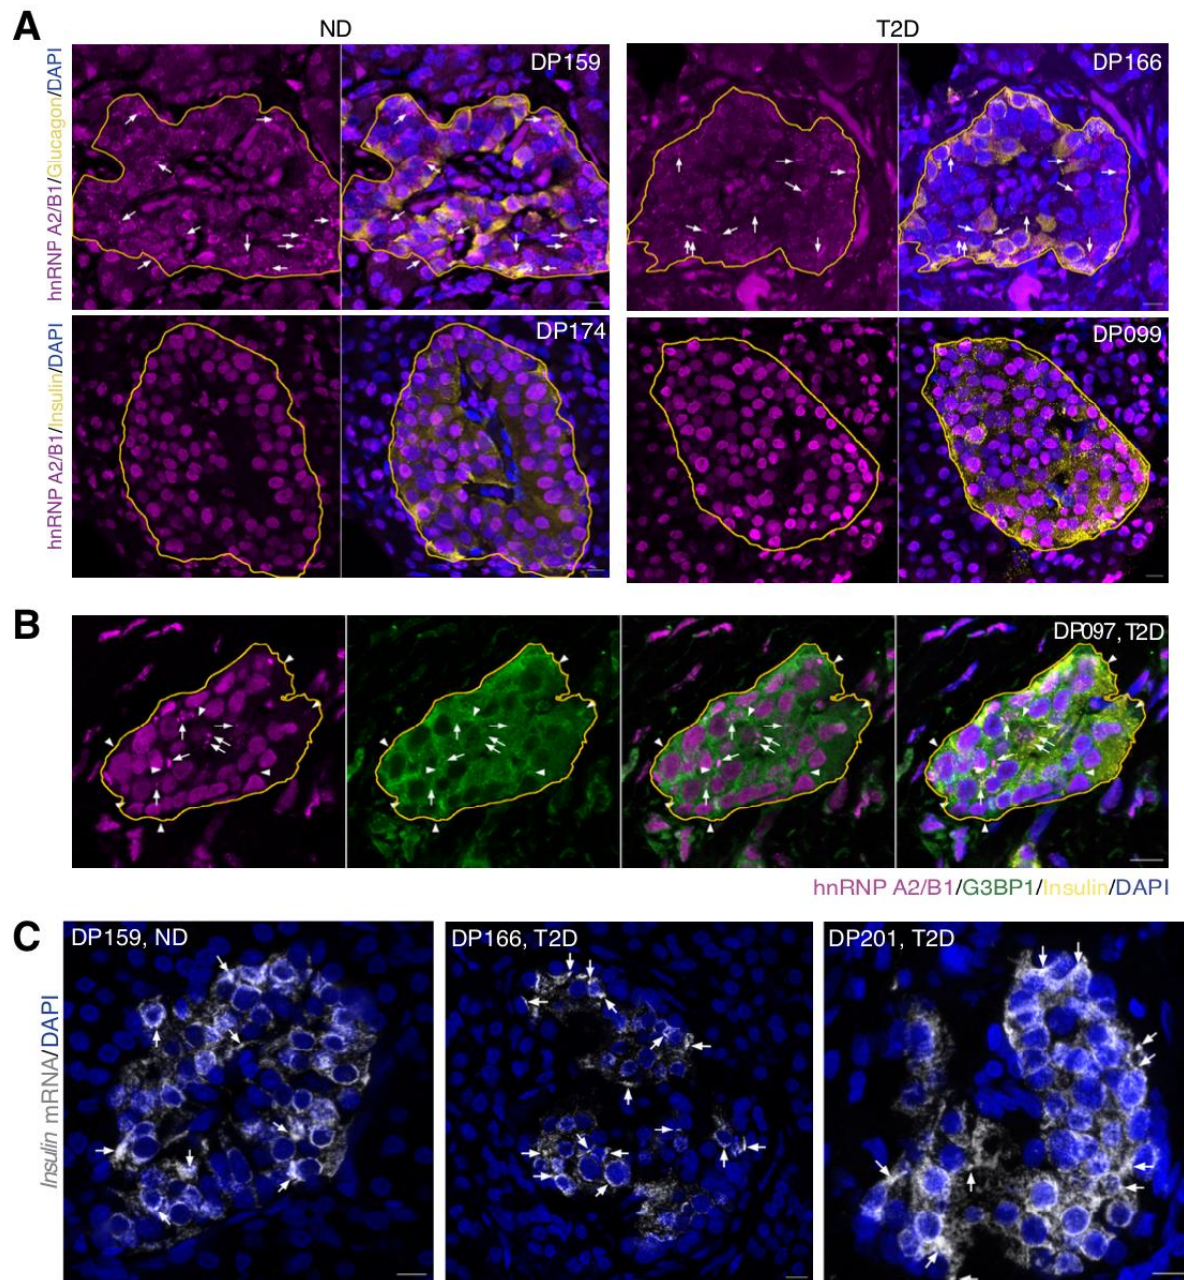

Source: http://biorxiv.org/content/10.1101/2021.05.07.443159v1.full.pdf
